## **Tetraspanin Tspan15 is an essential subunit of an ADAM10 scissor complex**

Chek Ziu Koo<sup>1,2\*</sup>, Neale Harrison<sup>1\*</sup>, Peter J. Noy<sup>1\*</sup>, Justyna Szyroka<sup>1</sup>, Alexandra L. Matthews<sup>1</sup>, Hung-En Hsia<sup>3</sup>, Stephan A. Mueller<sup>3</sup>, Johanna Tüshaus<sup>3</sup>, Joelle Goulding<sup>2,4</sup>, Katie Willis<sup>1</sup>, Clara Apicella<sup>1</sup>, Bethany Cragoe<sup>1</sup>, Edward Davis<sup>1</sup>, Murat Keles<sup>1</sup>, Antonia Malinova<sup>1</sup>, Thomas A. McFarlane<sup>1</sup>, Philip R. Morrison<sup>1</sup>, Michael C. Sykes<sup>1</sup>, Haroon Ahmed<sup>1</sup>, Alessandro Di Maio<sup>1</sup>, Lisa Seipold<sup>5</sup>, Paul Saftig<sup>5</sup>, Eleanor Cull<sup>1</sup>, Eric Rubinstein<sup>6</sup>, Natalie S. Poulter<sup>2,7</sup>, Stephen J. Briddon<sup>2,4</sup>, Nicholas D. Holliday<sup>4</sup>, Stefan F. Lichtenthaler<sup>3</sup> and Michael G. Tomlinson<sup>1,2,#</sup>

<sup>1</sup>*School of Biosciences, University of Birmingham, Birmingham, United Kingdom.* <sup>2</sup>*Centre of Membrane Proteins and Receptors (COMPARE), Universities of Birmingham and Nottingham, Midlands, United Kingdom;* <sup>3</sup>*German Center for Neurodegenerative Diseases (DZNE) Munich, Neuroproteomics, Klinikum rechts der Isar, Technical University Munich and Munich Cluster for Systems Neurology (SyNergy), Munich, Germany;* <sup>4</sup>*Division of Physiology, Pharmacology and Neuroscience, School of Life Sciences, University of Nottingham, Nottingham, United Kingdom;* <sup>5</sup>*Institute of Biochemistry, Christian Albrechts University Kiel, Kiel, Germany;* <sup>6</sup>*Inserm, U935, F-94807, Villejuif, France;* <sup>7</sup>*Institute of Cardiovascular Sciences, University of Birmingham, Birmingham, United Kingdom.*

\*Authors contributed equally to this work.

#To whom correspondence should be addressed: Michael G. Tomlinson: School of Biosciences, College of Life and Environmental Sciences, University of Birmingham, Birmingham, B15 2TT, United Kingdom; E-mail: [m.g.tomlinson@bham.ac.uk](mailto:m.g.tomlinson@bham.ac.uk); Tel.: 44-(0)121-414-2507; Fax: 44-(0)121-414-5925.

## 1 **Abstract**

2 A disintegrin and metalloprotease 10 (ADAM10) is essential for embryonic development and  
3 impacts on diseases such as cancer, Alzheimer's and inflammatory diseases. ADAM10 is a  
4 'molecular scissor' that proteolytically cleaves the extracellular region from over 100 substrates,  
5 including Notch, amyloid precursor protein, cadherins, growth factors and chemokines.  
6 ADAM10 was recently proposed to function as six distinct scissors with different substrates,  
7 depending on its association with one of six regulatory tetraspanins, termed TspanC8s.  
8 However, it remains unclear to what degree ADAM10 function is critically dependent on a  
9 TspanC8 partner. To address this, we generated the first monoclonal antibodies to Tspan15 as a  
10 model TspanC8. These were used to show that ADAM10 is the principal Tspan15-interacting  
11 protein, that Tspan15 expression requires ADAM10 in cell lines and primary cells, and that a  
12 synthetic ADAM10/Tspan15 fusion protein is a functional scissor. Together these findings  
13 suggest that ADAM10 exists as an intimate ADAM10/TspanC8 scissor complex.

14

## 15 **Introduction**

16 A disintegrin and metalloproteinase 10 (ADAM10) is a ubiquitously-expressed transmembrane  
17 protein which acts as a ‘molecular scissor’ by cleaving the extracellular region from over 100  
18 substrates, a process termed ectodomain shedding (Lichtenthaler *et al.* 2018). ADAM10 is  
19 essential for embryonic development by activating Notch proteins which determine cell fate.  
20 Other substrates include cadherin adhesion molecules, amyloid precursor protein, and  
21 transmembrane growth factors and chemokines. As such, ADAM10 is important for health and  
22 in diseases such as cancer, Alzheimer’s and inflammatory diseases (Wetzel *et al.* 2017).

23 The tetraspanins are a superfamily of 33 transmembrane proteins in mammals which interact  
24 with specific transmembrane partner proteins and regulate their intracellular trafficking, lateral  
25 mobility and clustering at the cell surface (Termini and Gillette 2017; van Deventer *et al.* 2017).  
26 The first crystal structure of a tetraspanin suggests the capacity for conformational change,  
27 regulated by cholesterol binding within a cavity formed by the four transmembrane helices  
28 (Zimmerman *et al.* 2016). This raises the possibility that tetraspanins regulate their partner  
29 proteins as molecular switches. We and others have identified six TspanC8 tetraspanins as  
30 regulators of ADAM10 intracellular trafficking and enzymatic maturation (Dornier *et al.* 2012;  
31 Haining *et al.* 2012; Prox *et al.* 2012). The TspanC8s comprise Tspan5, 10, 14, 15, 17 and 33,  
32 and are so-called because of eight cysteines within their large extracellular loop. Different cell  
33 types express distinct TspanC8 repertoires (Matthews *et al.* 2017; Matthews *et al.* 2018) and  
34 emerging evidence suggests that each TspanC8 may cause ADAM10 to cleave specific  
35 substrates (Dornier *et al.* 2012; Jouannet *et al.* 2016; Noy *et al.* 2016; Reyat *et al.* 2017; Saint-  
36 Pol *et al.* 2017; Seipold *et al.* 2018; Brummer *et al.* 2019). However, there is an urgent need to  
37 generate monoclonal antibodies (mAbs) to all TspanC8s, to define fully their expression profiles  
38 and functional mechanisms. Moreover, it remains to be determined whether ADAM10 functions  
39 as an intimate ADAM10/TspanC8 complex or whether TspanC8s are merely modulators of  
40 ADAM10 trafficking.

41 This study focuses on Tspan15 as a model TspanC8. Tspan15 is best characterised by its  
42 capacity to promote ADAM10 cleavage of N-cadherin in cell lines and *in vivo* (Prox *et al.* 2012;  
43 Jouannet *et al.* 2016; Noy *et al.* 2016; Seipold *et al.* 2018). Tspan15 is also upregulated, and is a  
44 marker of poor prognosis, in certain cancers (Zhang *et al.* 2018; Hiroshima *et al.* 2019;  
45 Sidahmed-Adrar *et al.* 2019) and promotes cancer progression in a mouse model (Zhang *et al.*  
46 2018). The aims of this study were to generate the first Tspan15 mAbs and to test three  
47 hypotheses that would support the theory that Tspan15 and ADAM10 exist together as a scissor  
48 complex: first, that ADAM10 is the principal Tspan15-interacting protein; second, that Tspan15  
49 expression requires ADAM10; and third, that covalently linking Tspan15 and ADAM10 together  
50 as a single fusion protein yields a functional scissor.

51

## 52 **Results**

### 53 **Generation of Tspan15 mAbs**

54 The majority of anti-tetraspanin mAbs have epitopes within the large extracellular loop (LEL).  
55 However, it has been traditionally difficult to make mAbs to many tetraspanins due to lack of  
56 efficacy of recombinant LELs as immunogens. Furthermore, use of tetraspanins expressed in  
57 whole cells as the immunogen is complicated by their relatively high sequence conservation  
58 between species, their relatively small size and possible masking of mAb epitopes by larger  
59 partner proteins (Rubinstein *et al.* 2013). We therefore hypothesised that expression of human  
60 Tspan15 in ADAM10-knockout mouse cells would ‘unmask’ Tspan15, allowing the generation  
61 of a mAb response in mice immunised with these cells. Thus, ADAM10-knockout mouse  
62 embryonic fibroblasts (MEFs) (Reiss *et al.* 2005) stably overexpressing FLAG-tagged human  
63 Tspan15 were generated by lentiviral transduction, and cell lysates were immunoblotted with a  
64 FLAG antibody to confirm expression (Figure 1A). Immunisation of mice with these cells, and  
65 subsequent hybridoma generation, was outsourced to Abpro Therapeutics. Four positive  
66 hybridomas were identified by screening of hybridoma tissue culture supernatants by flow  
67 cytometry of wild-type versus CRISPR/Cas9 Tspan15-knockout Jurkat T cells (Figure 1B). The  
68 mAbs were isotyped as IgG1 $\kappa$  for clones 1C12, 4A4 and 5D4, and IgG2B $\kappa$  for 5F4 (data not  
69 shown). To investigate whether the Tspan15 mAbs might cross-react with other members of the  
70 TspanC8 family, HEK-293T cells were transfected with FLAG-tagged Tspan5, Tspan10,  
71 Tspan14, Tspan15, Tspan17 or Tspan33, and whole cell lysates western blotted. Tspan15 was  
72 detected by each of the four Tspan15 mAbs, but none of the other TspanC8s were detected  
73 (Figure 1C). To determine whether the Tspan15 mAbs can co-immunoprecipitate ADAM10,  
74 human platelets were lysed in the relatively stringent 1% digitonin lysis buffer that was  
75 previously used to identify TspanC8/ADAM10 interactions (Dornier *et al.* 2012; Haining *et al.*  
76 2012). Tspan15 immunoprecipitation followed by ADAM10 western blotting showed that each  
77 mAb effectively co-immunoprecipitated ADAM10 (Figure 1D). Therefore, these data validate  
78 the four new mAbs as specific mouse anti-human Tspan15 reagents capable of  
79 immunoprecipitating Tspan15/ADAM10 complexes.

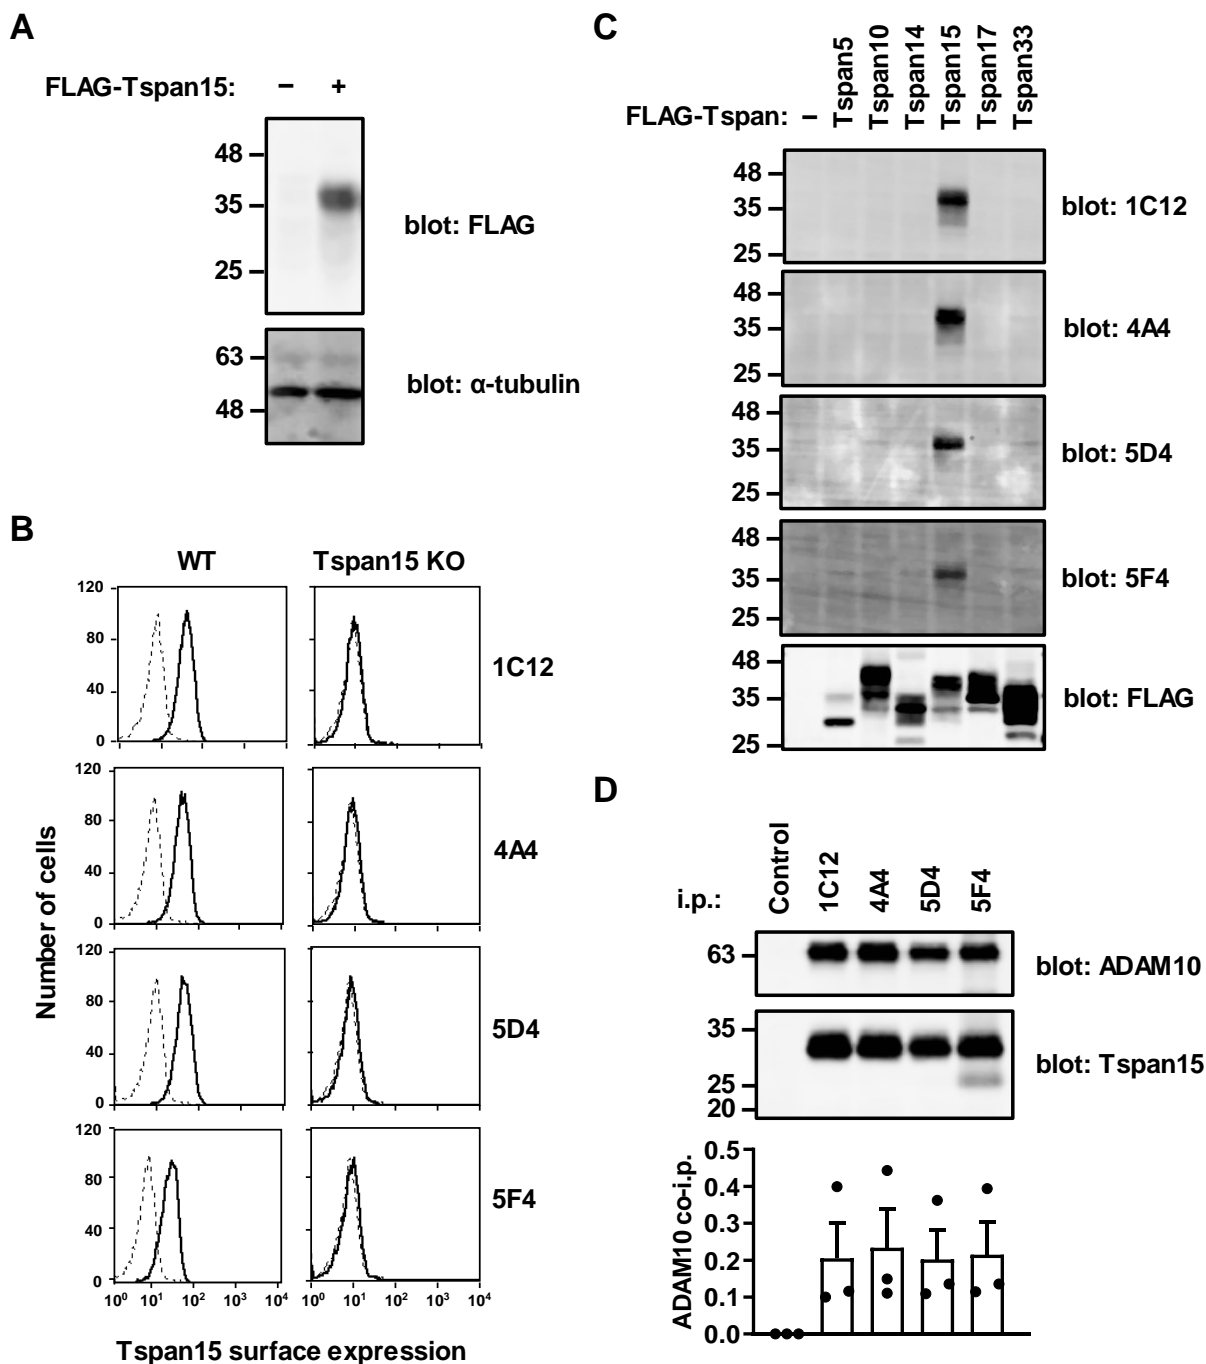

80

81

82 **Figure 1. Generation of human Tspan15-expressing MEFs as an immunogen and validation**  
 83 **of resulting mouse anti-human Tspan15 mAbs.** (A) ADAM10-knockout MEFs (-) and  
 84 ADAM10-knockout MEFs stably overexpressing FLAG-tagged Tspan15 (+) were lysed in 1%  
 85 Triton X-100 lysis buffer and subjected to anti-FLAG (top panel) and anti- $\alpha$ -tubulin (bottom  
 86 panel) western blotting. (B) Wild-type (WT) and Tspan15-knockout (KO) Jurkat human T cells

87 were analysed by flow cytometry with tissue culture supernatant for each of the four mouse anti-  
88 human Tspan15 hybridomas (1C12, 4A4, 5D4 or 5F4; solid line), or with mouse IgG1 as a  
89 negative control (dotted line). Histograms are representative of two independent experiments.  
90 (C) HEK-293T cells were transfected with FLAG-tagged human TspanC8 expression constructs  
91 (except for Tspan10, which was of mouse origin) or an empty vector control (-), lysed in 1%  
92 Triton X-100 lysis buffer and western blotted with tissue culture supernatants for each of the four  
93 Tspan15 hybridomas, or a positive control FLAG antibody. Blots are representative of three  
94 independent experiments. (D) Human platelets were lysed in 1% digitonin lysis buffer and  
95 subjected to immunoprecipitation with the four Tspan15 mAbs or a negative control mouse  
96 IgG1, followed by anti-ADAM10 and anti-Tspan15 (5D4) western blotting (upper panels). The  
97 faint additional band in the 5F4 lane corresponds to light chain from the immunoprecipitating  
98 mAb (data not shown). To quantitate the data, the amount of ADAM10 co-immunoprecipitated  
99 was normalised to the amount of immunoprecipitated Tspan15 with each antibody (lower panel).  
100 Error bars represent standard error of the mean from three independent experiments.

101

## 102 **The four Tspan15 mAbs bind to similar epitopes in the large extracellular loop**

103 To determine whether the Tspan15 mAbs have epitopes in the large extracellular loop (LEL),  
104 previously described Tspan15/Tspan5 chimeric GFP-tagged constructs were used in which the  
105 LELs were exchanged (Saint-Pol *et al.* 2017). In flow cytometry analyses of transfected HEK-  
106 293T cells, the four Tspan15 mAbs detected the Tspan15 LEL on a Tspan5 backbone (T5-  
107 LEL15), but not the reciprocal protein (T15-LEL5) (Figure 2A). As a control, a Tspan5 mAb  
108 detected Tspan5 LEL on a Tspan15 backbone (Figure 2A), as previously reported (Saint-Pol *et*  
109 *al.* 2017). To investigate whether the Tspan15 mAbs have overlapping epitopes, an antibody  
110 binding competition assay was performed. To do this, the A549 lung epithelial cell line was  
111 preincubated with one of the Tspan15 mAbs or a control antibody, and then incubated with  
112 Tspan15 mAbs conjugated to Alexa Fluor® 647. Flow cytometry analyses showed that all four  
113 unlabelled Tspan15 mAbs inhibited binding of the each of the four labelled Tspan15 mAbs  
114 (Figure 2B), suggesting that their epitopes are located in close proximity. Within the Tspan15  
115 LEL, only eight of the 121 amino acid residues vary between mouse and human, all within the  
116 C-terminal half of the LEL (Figure 2C). Since none of the Tspan15 mAbs detected mouse  
117 Tspan15 by western blotting (Figure 2D), this suggested that some of the differing residues were  
118 important for antibody binding. To determine which were important, four FLAG-tagged  
119 Tspan15 human/mouse chimeric constructs were made by substituting residues within the LEL  
120 of human Tspan15 with the corresponding mouse residues (Figure 2C), an approach that we used  
121 previously to epitope map mAbs to tetraspanin CD53 (Tomlinson *et al.* 1993; Tomlinson *et al.*  
122 1995). Western blotting of lysates from transfected Tspan15-knockout HEK-293T cells showed  
123 that reactivity of all four Tspan15 mAbs was almost completely lost by changing residues FSV  
124 to LNA, but unaffected in the three other chimeras (Figure 2D). However, the human FSV  
125 sequence was not sufficient for recognition, because introduction of these residues into mouse  
126 Tspan15 did not enable recognition by the four Tspan15 mAbs (Figure 2E). Taken together,  
127 these data show that all four Tspan15 mAbs bind to similar epitopes within the LEL.





129 **Figure 2. The four Tspan15 mAbs bind to similar epitopes in the large extracellular loop.**  
130 (A) Tspan15-knockout HEK-293T cells were transfected with GFP-tagged Tspan5 with the large  
131 extracellular loop of Tspan15 (T5-LEL15) or the reciprocal chimeric expression construct (T15-  
132 LEL5). Cells were stained with the four Tspan15 mAbs (1C12, 4A4, 5D4 or 5F4), Tspan5 mAb  
133 (TS5-2) or negative control mouse IgG1, followed by APC-conjugated anti-mouse antibody and  
134 flow cytometry analyses. (B) A549 cells were preincubated with one of the four unlabelled  
135 Tspan15 mAbs, or a negative control mouse IgG1, for 30 minutes and stained with Alexa Fluor®  
136 647-conjugated Tspan15 mAbs. Antibody binding, relative to unstained cells, was quantitated  
137 by flow cytometry. Data were log-transformed and statistically analysed by a two-way ANOVA  
138 with Tukey's multiple comparisons test. Error bars represent the standard error of the mean from  
139 three independent experiments (\*\* $p < 0.001$  for control compared to each of the mAb  
140 preincubations). (C) Amino acid sequence alignment of the C-terminal half of human (h) and  
141 mouse (m) Tspan15 large extracellular loop region with Clustal Omega (Sievers *et al.* 2011).  
142 Sequence differences are in red, and sequences exchanged in the four mutant constructs are  
143 indicated by horizontal lines above the line-up. (D) Tspan15-knockout HEK-293T cells were  
144 transfected with FLAG-tagged human Tspan15, mouse Tspan15, four chimeric constructs with  
145 human Tspan15 residues replaced by corresponding mouse residues, or an empty vector control  
146 (-). Cells were lysed in 1% Triton X-100 lysis buffer and subjected to anti-Tspan15 or anti-  
147 FLAG western blotting. (E) Tspan15-knockout HEK-293T cells were transfected with FLAG-  
148 tagged human Tspan15, mouse Tspan15 or a chimeric construct comprising mouse Tspan15 with  
149 three residues of the corresponding human sequence. Cell lysates were western blotted as  
150 described in panel D. Data for panels D-E are each representative of three experiments, from  
151 which quantitation demonstrated no significant detection of mouse Tspan15 or the FSV to LNA  
152 and reciprocal chimera (data not shown).

153 **ADAM10 is the principal Tspan15-interacting protein**

154 The generation of Tspan15 mAbs enabled the first proteomic identification of interactors with  
155 endogenous Tspan15. To do this, Tspan15 mAb 1C12 was used to immunoprecipitate Tspan15  
156 from wild-type HEK-293T cells lysed in the relatively stringent detergent 1% digitonin;  
157 Tspan15-knockout cells were used as a negative control. Subsequent mass spectrometry  
158 identification revealed 28 proteins that were significantly detected in wild-type versus Tspan15-  
159 knockout samples from five independent experiments (Table 1 and Supplementary Table 1).  
160 Expression of the entire dataset as a volcano plot illustrated how the most significant and  
161 differential protein identified was ADAM10 (Figure 3). Indeed, ADAM10 and Tspan15 were  
162 the only proteins above the false discovery threshold for these experiments (Figure 3). These  
163 data suggest that ADAM10 is the principal Tspan15-interacting protein in HEK-293T cells.

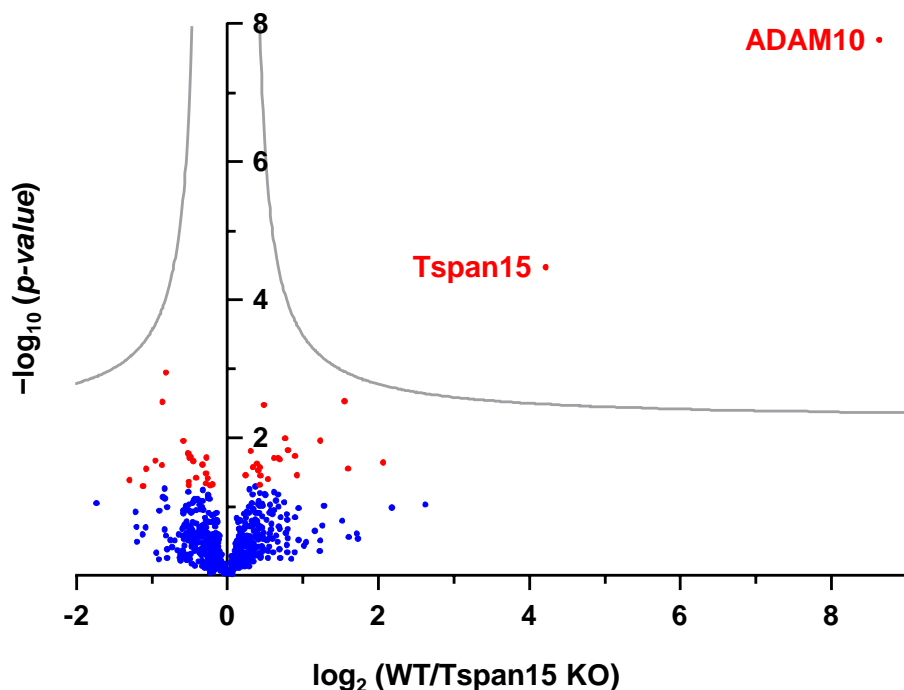

164

165

166 **Figure 3. ADAM10 is the principal Tspan15-interacting protein in HEK-293T cells.**

167 Wildtype (WT) and Tspan15-knockout (KO) HEK-293T cells were lysed in 1% digitonin lysis  
168 buffer and immunoprecipitated with Tspan15 mAb 1C12 cross-linked to protein G sepharose  
169 beads. Proteins were identified by liquid chromatography coupled with tandem mass  
170 spectrometry (LC-MS/MS). Proteomic profiles of WT and Tspan15 KO HEK-293T  
171 immunoprecipitates are presented in a volcano plot to identify differentially expressed proteins.  
172 The minus  $\log_{10}$  transformed  $p$ -value of each protein was plotted against the  $\log_2$  transformed  
173 protein label free quantification ratio between the Tspan15 co-immunoprecipitation of WT  
174 samples and the control co-immunoprecipitation of Tspan15 KO samples. Proteins with  
175 significant fold change ( $p < 0.05$ ) are depicted in red; blue dots represent proteins with no  
176 significant changes in expression. A permutation-based false discovery rate estimation was  
177 applied and visualised as hyperbolic curves in grey.

178

179 **Table 1. Proteins identified in Tspan15 immunoprecipitates.** The table contains proteins  
 180 significantly enriched in the Tspan15 immunoprecipitation samples of wild-type (WT) compared  
 181 to Tspan15-knockout (KO) samples. Five additional proteins detected in WT samples (in at least  
 182 3 of 5 biological replicates), but not in more than one Tspan15 KO sample, are indicated with an  
 183 asterisk. UniProt accession, protein name, gene name, *p*-value, fold difference between wild-  
 184 type and Tspan15-KO samples are listed. In addition, UniProt annotations indicate the  
 185 localization of the proteins.

186

| Accession     | Protein name                                                     | Gene name | <i>p</i> -value | Fold difference (WT vs KO) | Localization        |
|---------------|------------------------------------------------------------------|-----------|-----------------|----------------------------|---------------------|
| <b>O14672</b> | Disintegrin and metalloproteinase domain-containing protein 10   | ADAM10    | 1.70E-08        | 397.32                     | Membrane            |
| <b>O95858</b> | Tetraspanin-15                                                   | TSPAN15   | 3.38E-05        | 18.57                      | Membrane            |
| <b>P52209</b> | 6-phosphogluconate dehydrogenase, decarboxylating                | PGD       | 2.28E-02        | 4.18                       | Cytoplasm           |
| <b>P62879</b> | Guanine nucleotide-binding protein G(I)/G(S)/G(T) subunit beta-2 | GNB2      | 2.80E-02        | 3.02                       | Cytoplasm           |
| <b>Q08380</b> | Galectin-3-binding protein                                       | LGALS3BP  | 2.92E-03        | 2.92                       | x                   |
| <b>Q14315</b> | Filamin-C                                                        | FLNC      | 1.10E-02        | 2.34                       | Cytoplasm, Membrane |
| <b>P46779</b> | 60S ribosomal protein L28                                        | RPL28     | 3.47E-02        | 1.89                       | x                   |
| <b>P27824</b> | Calnexin                                                         | CANX      | 1.82E-02        | 1.86                       | Membrane            |
| <b>Q8WU90</b> | Zinc finger CCCH domain-containing protein 15                    | ZC3H15    | 1.51E-02        | 1.75                       | Cytoplasm           |
| <b>Q8NEZ5</b> | F-box only protein 22                                            | FBXO22    | 1.02E-02        | 1.70                       | Cytoplasm           |
| <b>Q9HAD4</b> | WD repeat-containing protein 41                                  | WDR41     | 2.05E-02        | 1.61                       | Cytoplasm           |
| <b>Q12907</b> | Vesicular integral-membrane protein VIP36                        | LMAN2     | 1.97E-02        | 1.59                       | Membrane            |
| <b>P63000</b> | Ras-related C3 botulinum toxin substrate 1                       | RAC1      | 1.96E-02        | 1.53                       | Cytoplasm, Membrane |
| <b>P23528</b> | Cofilin-1                                                        | CFL1      | 3.95E-02        | 1.45                       | Cytoplasm, Membrane |
| <b>Q4KMP7</b> | TBC1 domain family member 10B                                    | TBC1D10B  | 3.35E-03        | 1.40                       | Cytoplasm           |
| <b>Q9Y2G5</b> | GDP-fucose protein O-fucosyltransferase 2                        | POFUT2    | 3.52E-02        | 1.35                       | x                   |
| <b>P36639</b> | 7,8-dihydro-8-oxoguanine triphosphatase                          | NUDT1     | 2.69E-02        | 1.35                       | Cytoplasm           |
| <b>Q15020</b> | Squamous cell carcinoma antigen recognized by T-cells 3          | SART3     | 4.79E-02        | 1.34                       | Cytoplasm           |

|               |                                             |           |          |      |           |
|---------------|---------------------------------------------|-----------|----------|------|-----------|
| <b>Q9P2E9</b> | Ribosome-binding protein 1                  | RRBP1     | 2.95E-02 | 1.33 | Membrane  |
| <b>Q13042</b> | Cell division cycle protein 16 homolog      | CDC16     | 2.39E-02 | 1.31 | Cytoplasm |
| <b>P27348</b> | 14-3-3 protein theta                        | YWHAQ     | 2.66E-02 | 1.27 | Cytoplasm |
| <b>Q8WUM4</b> | Programmed cell death 6-interacting protein | PDCD6IP   | 1.56E-02 | 1.24 | Cytoplasm |
| <b>P40926</b> | Malate dehydrogenase, mitochondrial         | MDH2      | 3.49E-02 | 1.18 | x         |
| <b>P62304</b> | Small nuclear ribonucleoprotein E           | SNRPE     | *        | 0.73 | Cytoplasm |
| <b>O43172</b> | U4/U6 small nuclear ribonucleoprotein Prp4  | PRPF4     | *        | 1.45 | x         |
| <b>Q99878</b> | Histone H2A type 1-J                        | HIST1H2AJ | *        | 0.73 | x         |
| <b>P51809</b> | Vesicle-associated membrane protein 7       | VAMP7     | *        | 1.88 | Membrane  |
| <b>Q7L576</b> | Cytoplasmic FMR1-interacting protein 1      | CYFIP1    | *        | -    | Cytoplasm |

187

188

## 189 **Tspan15 protein expression requires ADAM10**

190 It is well established that TspanC8s promote the enzymatic maturation and trafficking of  
191 ADAM10 from the endoplasmic reticulum (ER) to the cell surface (Dornier *et al.* 2012; Haining  
192 *et al.* 2012; Prox *et al.* 2012). More recently, it was suggested that the reverse might be true,  
193 since ADAM10 knockdown reduced the trafficking of Tspan5 from the ER in HCT116 and  
194 U2OS cell lines (Saint-Pol *et al.* 2017). To investigate whether Tspan15 surface expression also  
195 requires ADAM10, flow cytometry was performed on CRISPR/Cas9 ADAM10-knockout cell  
196 lines. Tspan15 surface expression, as revealed by flow cytometry, was reduced by  
197 approximately 80% in the absence of ADAM10 in Jurkat, HEK-293T and A549 cells (Figure  
198 4A). This observation held true in primary cells, since Tspan15 expression was almost  
199 undetectable following siRNA knockdown of ADAM10 in human umbilical vein endothelial  
200 cells (HUVECs) (Figure 4B). To determine whether the reduction in surface Tspan15 was  
201 consistent with a reduction in whole cell Tspan15, western blotting was performed on Tspan15  
202 immunoprecipitates from Jurkat cell lysates. Similar to the flow cytometry data, Tspan15  
203 protein expression was reduced by approximately 80% in the absence of ADAM10 (Figure 4C).  
204 Importantly, the loss of Tspan15 protein was not a consequence of reduced Tspan15 mRNA  
205 expression in the absence of ADAM10, as this was unaffected in ADAM10-knockout cell lines  
206 as measured by qRT-PCR (Figure 4D). These data demonstrate that ADAM10 and Tspan15 are  
207 each required for expression of the other, providing genetic evidence that the two proteins  
208 cooperate in a functional scissor complex.

209 The requirement of ADAM10 for normal Tspan15 protein expression is inconsistent with the  
210 fact that human Tspan15 was successfully expressed in ADAM10-knockout MEFs to generate  
211 the immunogen for Tspan15 mAb generation (Figure 1A). To address whether over-expression  
212 of Tspan15 might overcome the requirement for ADAM10, HEK-293T cells were transiently  
213 transfected with Tspan15 and analysed by flow cytometry. In this over-expression scenario,  
214 Tspan15 expression was comparable in wild-type versus ADAM10-knockout cells (Figure 4E).  
215 Therefore, it appears that endogenous Tspan15 protein expression requires ADAM10, but over-  
216 expressed Tspan15 can bypass this requirement.

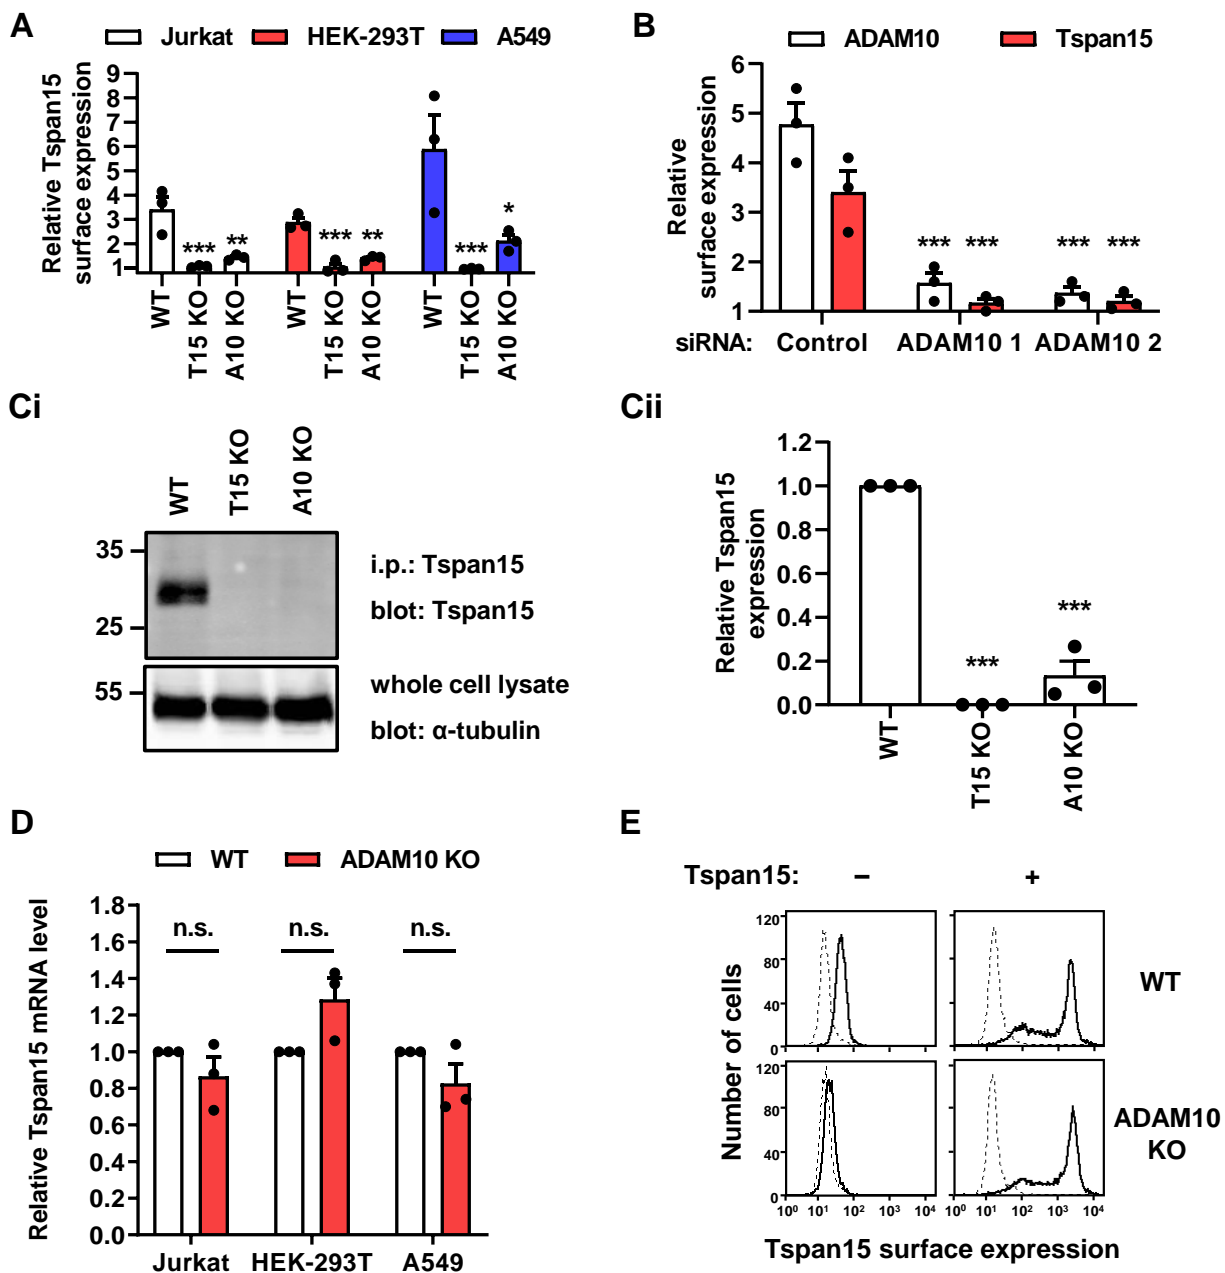

217

218 **Figure 4. Tspan15 protein expression requires ADAM10.** (A) Tspan15 surface expression in  
 219 wildtype (WT), Tspan15-knockout (KO) and ADAM10 KO Jurkat, HEK-293T and A549 cell  
 220 lines were analysed by flow cytometry with anti-Tspan15 mAb 1C12 or mouse IgG1 negative  
 221 control antibody. Tspan15 surface expression is presented as the geometric mean fluorescence  
 222 intensity of Tspan15 staining relative to the control staining. Error bars represent standard error  
 223 of the mean from three independent experiments. Data were log-transformed and statistically  
 224 analysed by a one-way ANOVA with Dunnett's multiple comparisons test (\* $p$ <0.05, \*\* $p$ <0.01,  
 225 \*\*\* $p$ <0.001 compared to WT). (B) HUVECs were transfected with two different ADAM10  
 226 siRNAs or a negative control siRNA and surface expression of ADAM10 and Tspan15 was

227 measured by flow cytometry and analysed as described in panel A. (Ci) WT, Tspan15 KO and  
228 ADAM10 KO Jurkat cells were lysed in 1% Triton X-100 lysis buffer, immunoprecipitated with  
229 anti-Tspan15 mAb 5D4, and western blotted with the same antibody. Whole cell lysates were  
230 blotted with anti- $\alpha$ -tubulin mAb. (Cii) Tspan15 levels from panel Ci were quantitated and  
231 normalised to WT expression. Error bars represent standard errors of the mean from three  
232 independent experiments. Data were log-transformed and statistically analysed by a one-way  
233 ANOVA with a Tukey's multiple comparisons test (\*\* $p < 0.001$  compared to WT). (D) Tspan15  
234 mRNA level in WT and ADAM10 KO Jurkat, HEK-293T and A549 cells were assessed by qRT-  
235 PCR and presented relative to GAPDH housekeeping gene expression. Error bars represent  
236 standard errors of the mean from three independent experiments. Data were log-transformed and  
237 statistically analysed by a two-way ANOVA followed by Tukey's multiple comparisons test  
238 (n.s., not significant). (E) WT and ADAM10 KO HEK-293T cells were transfected with empty  
239 vector control (-) or Tspan15 (+) expression constructs. Tspan15 surface expression was  
240 measured by flow cytometry as described in panel A. Histograms are representative of four  
241 independent experiments.

242



243 **The requirement of Tspan15 for ADAM10 surface expression is cell type dependent**

244 To assess the extent to which Tspan15 is required for ADAM10 surface expression in the cells  
245 examined in Figure 4, flow cytometry for ADAM10 was performed. ADAM10 surface  
246 expression was reduced by approximately 60% and 70% in Tspan15-knockout HEK-293T and  
247 A549 cells, respectively, but was unaffected in Jurkat T cells (Figure 5A). In HUVECs,  
248 ADAM10 surface expression was reduced by approximately 40% following Tspan15 siRNA  
249 knockdown (Figure 5B). Therefore, the importance of Tspan15 for ADAM10 surface expression  
250 depends on the cell type.

251

252

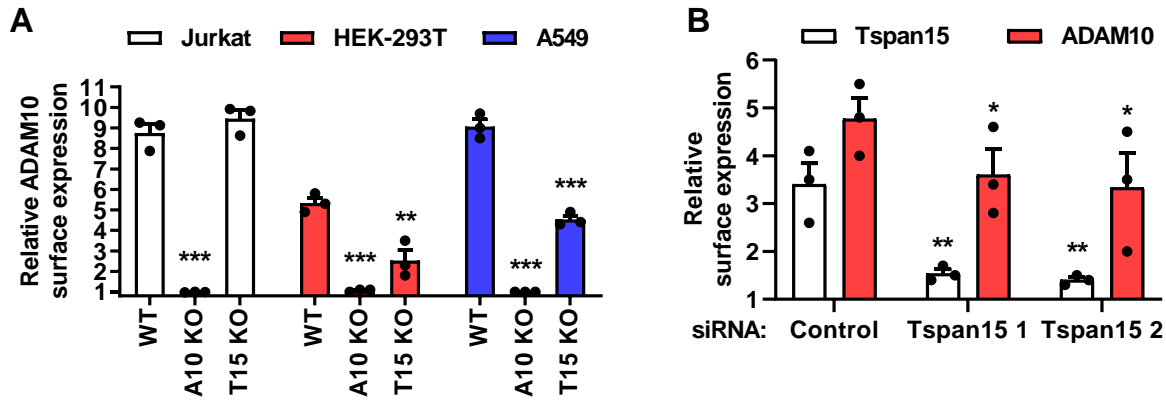

253

254 **Figure 5. The requirement of Tspan15 for ADAM10 surface expression is cell type**  
255 **dependent.** (A) ADAM10 surface expression in WT, ADAM10 KO and Tspan15 KO Jurkat,  
256 HEK-293T and A549 cells was measured by flow cytometry and quantitated as described in  
257 Figure 4A. (B) HUVECs were transfected with two different Tspan15 siRNAs or negative  
258 control siRNA and surface expression of ADAM10 was measured by flow cytometry and  
259 analysed as described in Figure 4A.

260 **ADAM10 and Tspan15 form dynamic bimolecular fluorescence complementation (BiFC)**  
261 **complexes**

262 A single particle tracking study has previously reported an apparent diffusion coefficient for  
263 ADAM10 of  $0.067 \mu\text{m}^2/\text{s}$  in U2OS cells, which increased to  $0.104 \mu\text{m}^2/\text{s}$  following Tspan15  
264 transfection (Jouannet *et al.* 2016). To more directly assess the lateral diffusion of  
265 ADAM10/Tspan15 complexes, and to image an ADAM10/Tspan15 dimer for the first time,  
266 bimolecular fluorescence complementation (BiFC) was employed. This technique allows  
267 formation of fluorescent protein dimers from two interacting proteins tagged with split  
268 fluorescent proteins, in this case Tspan15 fused to the N-terminal half of superfolder (sf)GFP and  
269 ADAM10 fused to the C-terminal half of sfGFP (Figure 6A). Formation of fluorescent BiFC  
270 ADAM10/Tspan15 dimers was confirmed by confocal microscopy of transfected HEK-293T  
271 cells, which showed a BiFC signal predominantly at the cell surface, similar to Tspan15 itself  
272 (Figure 6B). To examine the lateral diffusion of ADAM10/Tspan15 dimers on the apical  
273 membrane of transfected HEK-293T cells, fluorescence correlation spectroscopy (FCS) was  
274 used. The average number of fluorescent complexes/ $\mu\text{m}^2$  was 48 and the average diffusion speed  
275 was  $0.19 \mu\text{m}^2/\text{s}$  (Figure 6C-D). To then provide an indication of the oligomerisation state of the  
276 molecules, the average molecular brightness of ADAM10/Tspan15 dimers was determined using  
277 photon counting histogram (PCH) analysis. Of the FCS traces analysed, 58% fitted to a one-  
278 component PCH model (molecular brightness of  $2.2 \times 10^4$  cpm/s), whereas the remaining  
279 preferentially fitted to a two-component model that had dimmer ( $1.4 \times 10^4$  cpm/s) and brighter  
280 ( $5.4 \times 10^4$  cpm/s) subcomponents (Figure 6E). The molecular brightness of the dimmer traces  
281 was not significantly different from the one-component traces (Figure 6E). The presence of a  
282 brighter subcomponent suggests that some ADAM10/Tspan15 complexes were able to form  
283 larger clusters. Collectively, these data show that ADAM10 and Tspan15 can interact with each  
284 other to form dynamic BiFC dimers of varying stoichiometric ratio within nanoclusters.

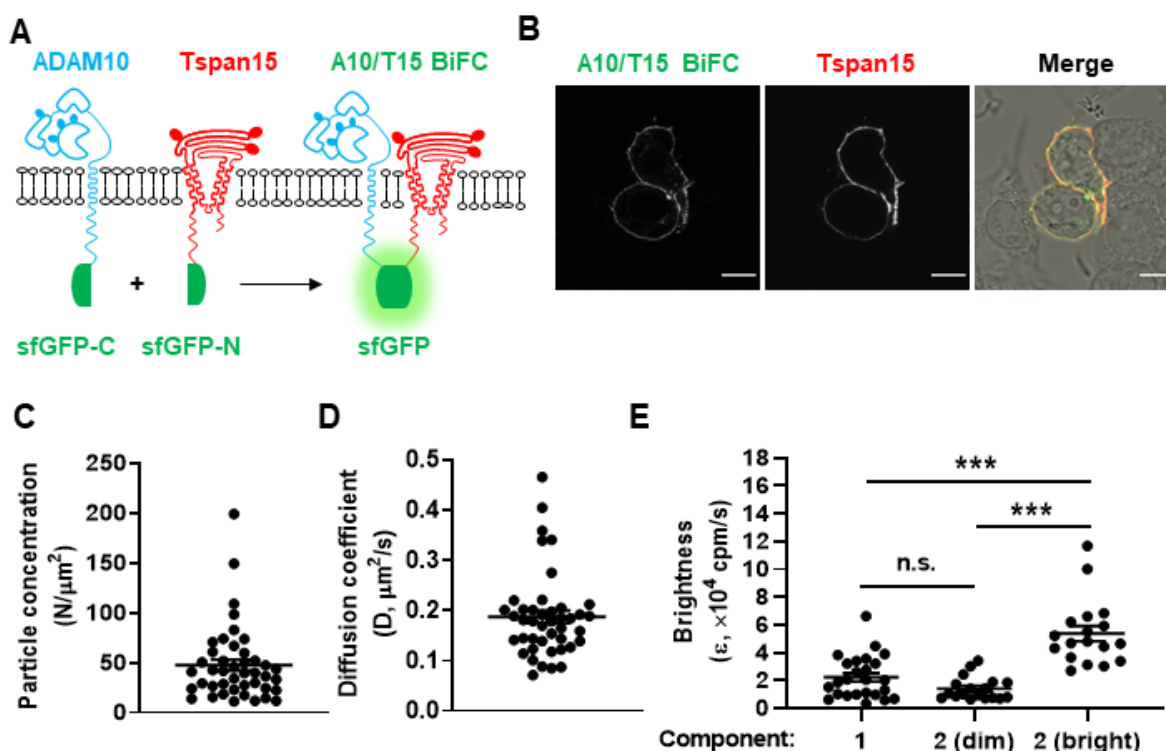

285

286 **Figure 6. ADAM10 and Tspan15 form dynamic bimolecular fluorescence complementation**  
 287 **(BiFC) complexes.** (A) Schematic representation of ADAM10 tagged with the C-terminal half  
 288 of superfolder GFP (sfGFP-C), Tspan15 tagged with the N-terminal half of superfolder GFP  
 289 (sfGFP-N) and the predicted ADAM10/Tspan15 BiFC dimer. Solid ovals represent N-  
 290 glycosylation. (B) HEK-293T cells were transfected with the ADAM10 and Tspan15 BiFC  
 291 expression constructs, fixed and stained with Alexa Fluor® 647-conjugated Tspan15 mAb 5D4,  
 292 and analysed by confocal microscopy. The image shown is representative of middle plane  
 293 sections taken from two independent experiments (scale bar 10 μm). (C-D) Fluorescence  
 294 correlation spectroscopy (FCS) measurements from the upper membrane of HEK-293T  
 295 expressing the ADAM10/Tspan15 BiFC complexes were used to determine the average particle  
 296 concentration (C) and diffusion co-efficient (D) of the complexes. (E) Fluorescence  
 297 fluctuations from the FCS reads were also subjected to photon counting histogram (PCH) analysis to obtain  
 298 the average molecular brightness (ε) of particles within the confocal volume. The FCS data were  
 299 separated into groups that preferentially fit to a one-component or a two-component PCH model  
 300 with dimmer and brighter subcomponents. Data were obtained from 43 individual measurements  
 301 from three independent experiments. Error bars represent standard errors of the mean, N is the  
 302 number of particles, and cpm is the counts per molecule. Data were log-transformed and  
 303 statistically analysed by a one-way ANOVA followed by Tukey's multiple comparisons test  
 304 (\*\*\*) ( $p < 0.001$ ).

305

306 **A synthetic ADAM10/Tspan15 fusion protein is a functional scissor**

307 If ADAM10 and Tspan15 cooperate in a functional scissor complex, one prediction is that  
308 covalently linking the two proteins into one synthetic fusion protein (Figure 7A) would not  
309 disrupt subcellular localisation or scissor function. An ADAM10/Tspan15 fusion expression  
310 construct was generated and transfected into ADAM10/Tspan15 double knockout HEK-293T  
311 cells. Western blotting with ADAM10 and Tspan15 mAbs verified that the ADAM10/Tspan15  
312 fusion protein had the predicted molecular weight of approximately 95 kD (Figure 7B), and flow  
313 cytometry (Figure 7C) and confocal microscopy (Figure 7D) showed that it was expressed at the  
314 cell surface. To test scissor function, ADAM10/Tspan15 double knockout HEK-293T cells were  
315 transfected with an expression construct for alkaline phosphatase-tagged betacellulin, a known  
316 ADAM10 substrate (Sahin *et al.* 2004), and shedding quantitated by measuring alkaline  
317 phosphatase activity released into the culture supernatant versus the non-shed activity remaining  
318 with the cells. Transfection of ADAM10/Tspan15 double knockout cells with the  
319 ADAM10/Tspan15 fusion protein construct restored betacellulin shedding to a level comparable  
320 to that of ADAM10 and Tspan15 transfected as individual constructs, in terms of both basal  
321 shedding and shedding induced by the ADAM10 activator N-ethylmaleimide (NEM) (Figure  
322 7Ei). Betacellulin shedding was partially dependent on Tspan15, because ADAM10 transfection  
323 alone was not sufficient to fully restore shedding (Figure 7Ei). To confirm expression of the  
324 constructs used in these experiments, ADAM10 flow cytometry was used; the fusion protein was  
325 expressed at approximately two-fold greater levels than ADAM10 individually with Tspan15  
326 (Figure 7Eii). These fusion protein data provide further evidence that ADAM10/Tspan15 exists  
327 as a functional scissor complex, because expression and function of the fusion protein are similar  
328 to when ADAM10 and Tspan15 are individually co-expressed.

329

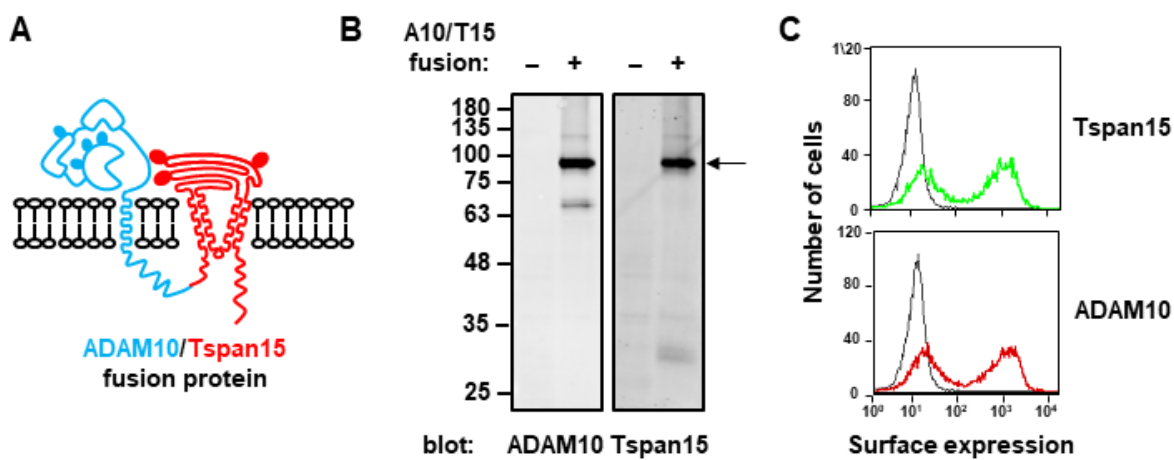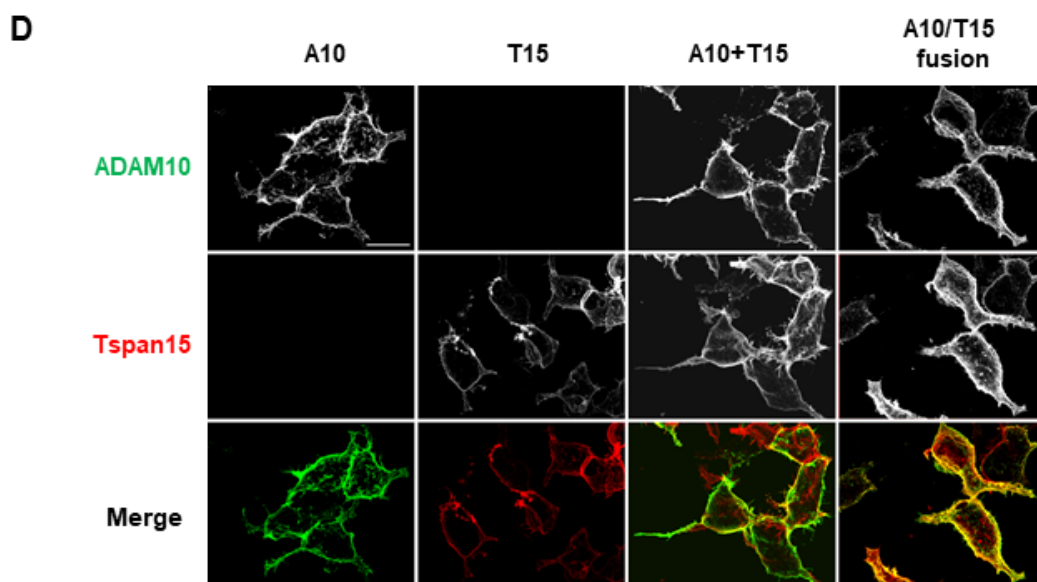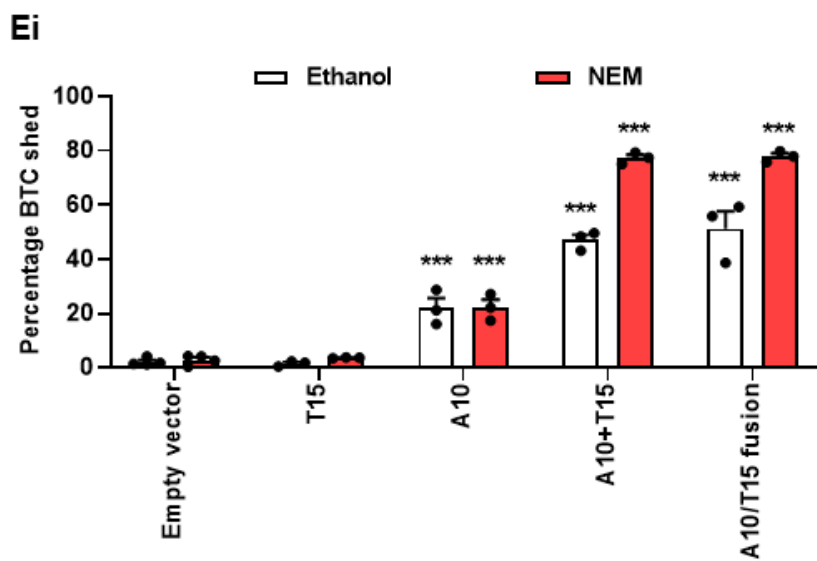

331 **Figure 7. A synthetic ADAM10/Tspan15 fusion protein is a functional scissor.** (A)  
332 Schematic representation of the synthetic ADAM10/Tspan15 fusion protein that has the C-  
333 terminus of ADAM10 physically linked to the N-terminus of Tspan15. Solid ovals represent N-  
334 glycosylation. (B) ADAM10/Tspan15 double KO HEK-293T cells were transfected with  
335 ADAM10/Tspan15 fusion construct, lysed in 1% digitonin lysis buffer in the presence of 10  $\mu$ M  
336 ADAM10 inhibitor GI254023X, to prevent post-lysis auto-proteolysis, and western blotted for  
337 ADAM10 and Tspan15. (C) Cells described in panel B were assessed for surface expression of  
338 Tspan15 (green) and ADAM10 (red) by flow cytometry. Black traces represent isotype control  
339 staining. (D) ADAM10/Tspan15 double KO HEK-293T cells were transfected with the  
340 indicated expression constructs and analysed by confocal microscopy using anti-ADAM10  
341 (green) and Tspan15 (red) mAbs. The cells were non-permeabilised and images are maximum  
342 intensity projections of confocal z-stacks. The scale bar on the upper left image is 30  $\mu$ m. (Ei)  
343 ADAM10/Tspan15 double KO HEK-293T cells were co-transfected with alkaline phosphatase-  
344 tagged betacellulin (BTC) and Tspan15, ADAM10, ADAM10 and Tspan15, the  
345 ADAM10/Tspan15 fusion, or an empty vector control. Cells were stimulated with 2 mM NEM  
346 or vehicle control and alkaline phosphatase activity was measured in the supernatant and whole  
347 cell lysates to quantitate the percentage of BTC shed. Data were arcsine-transformed and  
348 statistically analysed with a two-way ANOVA followed by a Tukey's multiple comparisons test  
349 (\*\*\*) $p < 0.001$  compared to empty vector-transfected control). (Eii) Transfected cells were  
350 assessed for surface expression of ADAM10 by flow cytometry and the data quantitated and  
351 analysed using a paired t-test ( $*p < 0.05$ ).

352



## 353 DISCUSSION

354 This study reports the generation of the first mAbs to tetraspanin Tspan15, which is one of six  
355 TspanC8 tetraspanins that regulate the molecular scissor ADAM10 (Matthews *et al.* 2017;  
356 Matthews *et al.* 2017; Saint-Pol *et al.* 2017) and was recently shown to promote cancer (Zhang *et al.*  
357 *et al.* 2018). These mAbs enabled three major findings: (1) ADAM10 is the principal Tspan15-  
358 interacting protein; (2) Tspan15 expression requires ADAM10; and (3) a synthetic  
359 ADAM10/Tspan15 fusion protein is a functional scissor. These data strongly suggest that  
360 ADAM10 and Tspan15 exist as a heterodimeric scissor complex.

361 The discovery that Tspan15 expression requires ADAM10 provides genetic evidence that the  
362 principal role of Tspan15 is to regulate ADAM10. This finding is consistent with a recent study  
363 on Tspan5 and ADAM10 (Saint-Pol *et al.* 2017). In that study, an approximate 70% siRNA  
364 knockdown of ADAM10 in the HCT116 and U2OS cell lines reduced Tspan5 expression by  
365 40%, and ADAM10 was shown to be important for trafficking of Tspan5 out of the ER (Saint-  
366 Pol *et al.* 2017). In the current study, we were able to investigate Tspan15 expression in the  
367 complete absence of ADAM10 by CRISPR/Cas9 knockout in three different cell lines, namely  
368 A549, HEK-293T and Jurkat. In each ADAM10-knockout cell line, Tspan15 expression was  
369 reduced by approximately 80%, as measured by flow cytometry and western blotting. Primary  
370 HUVECs yielded similar data, since 85-90% ADAM10 knockdown resulted in an equivalent  
371 reduction in Tspan15 protein expression. Importantly, Tspan15 mRNA expression levels were  
372 unaffected by ADAM10 knockout, indicating a specific effect on Tspan15 protein. Thus,  
373 Tspan15 and ADAM10 appear to be each required for the normal expression of the other.  
374 Indeed, it is well established that TspanC8s are important for ADAM10 maturation and  
375 trafficking to the cell surface (Dornier *et al.* 2012; Haining *et al.* 2012; Prox *et al.* 2012; Zhou *et al.*  
376 *et al.* 2014; Jouannet *et al.* 2016; Noy *et al.* 2016; Virreira Winter *et al.* 2016; Reyat *et al.* 2017;  
377 Brummer *et al.* 2018; Seipold *et al.* 2018; Shah *et al.* 2018; Brummer *et al.* 2019), and we  
378 extended these observations by showing that ADAM10 surface expression was partially reduced  
379 in the absence of Tspan15 in A549, HEK-293T and HUVECs. Expression of other TspanC8s by  
380 these cells (Haining *et al.* 2012; Matthews *et al.* 2017) is likely to be the reason that the reduction  
381 is only partial. However, the effect of Tspan15 on ADAM10 expression is cell type dependent,  
382 because no ADAM10 reduction was observed in Tspan15-knockout Jurkat T cells. It remains  
383 unclear why this is the case, but it is possible that Tspan15 protein expression is low in these  
384 cells, relative to other tetraspanins.

385 The previously discussed finding that Tspan15 expression requires ADAM10 suggests that the  
386 two proteins might exist as a functional complex. A prediction of this idea is that physically  
387 linking the two proteins into a single fusion protein would yield a functional scissor protein.  
388 Indeed, we found that an ADAM10/Tspan15 fusion protein was expressed at the cell surface at  
389 the predicted molecular weight, and was functional in a betacellulin shedding assay in a manner  
390 that was comparable to when the two proteins were expressed individually. In this shedding  
391 assay in the HEK-293T cell line, betacellulin shedding was entirely dependent on ADAM10, as



392 was previously reported in MEFs (Sahin *et al.* 2004). Our ADAM10/Tspan15 fusion protein is  
393 the first example of physically linking a tetraspanin to its partner protein, as a means of  
394 demonstrating that the two proteins can function as a complex. This approach may be useful for  
395 the investigation of other tetraspanins and their partners. Moreover, it may facilitate attempts to  
396 generate the first high-resolution structure of a tetraspanin/partner protein complex, which could  
397 provide fundamental new insights comparable to the recently-reported first crystal structure of a  
398 tetraspanin (Zimmerman *et al.* 2016). To date, the only structural study on a tetraspanin with its  
399 partner is the relatively low resolution (6 Å) cryo-electron microscopy study of tetraspanin  
400 uroplakins Ia and Ib with their uroplakin partners II and IIIa (Min *et al.* 2006).

401 Our study represents the first use of BiFC to enable the fluorescent imaging of a tetraspanin with  
402 its partner. BiFC uses two fusion proteins containing each half of a fluorescent protein, such as  
403 GFP, linked to the two proteins of interest, in this case ADAM10 and Tspan15. If the two  
404 proteins interact, the two halves of GFP will fold to form a fluorescent GFP molecule, and  
405 therefore any fluorescent signal can only be the result of a successful ADAM10/Tspan15  
406 heterodimer. Consistent with the idea that ADAM10 and Tspan15 exist as a functional complex,  
407 ADAM10/Tspan15 BiFC dimers were formed and localised predominantly to the plasma  
408 membrane, similar to the localisation of Tspan15 itself. To investigate the dynamics of  
409 ADAM10/Tspan15 dimers for the first time in living cells, FCS was used to investigate its  
410 diffusion speed and clustering in the plasma membrane of transfected HEK-293T cells. An  
411 average diffusion co-efficient of  $0.19 \mu\text{m}^2/\text{s}$  was similar to that previously reported for ADAM10  
412 ( $0.10 \mu\text{m}^2/\text{s}$ ) on Tspan15-transfected U2OS cells (Jouannet *et al.* 2016). However, that study  
413 measured ADAM10 rather than ADAM10/Tspan15 dimers (Jouannet *et al.* 2016), therefore a  
414 proportion of the diffusion speed will have been contributed by other ADAM10/TspanC8  
415 complexes. We also used FCS to assess the molecular brightness of ADAM10/Tspan15 BiFC  
416 dimers, to estimate the degree of clustering. The existence of some traces containing a brighter  
417 Tspan15/ADAM10 component was indicative of larger cluster formation, as has been observed  
418 for TspanC8s and other tetraspanins by super-resolution microscopy (Zuidsherwoude *et al.*  
419 2015; Marjon *et al.* 2016; Dahmane *et al.* 2019). We propose that FCS imaging of BiFC dimers  
420 will be useful for the study of other tetraspanin/partner protein complexes.

421 One prediction of the idea that ADAM10 and Tspan15 exist as a heterodimeric complex is that  
422 ADAM10 would be the major Tspan15-interacting partner. Using mass spectrometry to identify  
423 proteins in Tspan15 immunoprecipitates from HEK-293T cells lysed in the relatively stringent  
424 1% digitonin, ADAM10 was strikingly the most abundant protein. Indeed, ADAM10 was  
425 almost 400 times more abundant in Tspan15 immunoprecipitates from wild-type cells versus  
426 control Tspan15-knockout cells, and the only other protein identified above the false discovery  
427 rate threshold was Tspan15 itself. These data are consistent with two previous studies in which  
428 GFP-tagged Tspan15 was expressed in U2OS or HepG2 cells, which were lysed in relatively  
429 non-stringent 1% Brij97 and Tspan15 immunoprecipitated via the GFP tag (Jouannet *et al.* 2016;  
430 Sidahmed-Adrar *et al.* 2019). For example, mass spectrometry identified ADAM10 as 15-fold

431 more abundant than any other Tspan15-interacting proteins (Jouannet *et al.* 2016). However,  
432 interpretation was complicated in these two studies because of the use of less stringent detergent  
433 and the resulting large number of tetraspanin-associated proteins identified, the majority of  
434 which are likely to be indirectly associated with Tspan15. In our study, in addition to ADAM10,  
435 26 proteins were identified as being significantly more detected in wild-type versus Tspan15-  
436 knockout samples, but the most differential of these was only four-fold higher in wild-type.  
437 Thus, it remains to be determined whether any of these are definitive ADAM10/Tspan15-  
438 interacting proteins that impact functionally on the complex. Of note, we did not identify beta-  
439 transducin repeat containing E3 ubiquitin protein ligase (BTRC) amongst the putative Tspan15-  
440 interacting proteins. BTRC was recently reported to co-immunoprecipitate with Tspan15 from  
441 lysates of oesophageal squamous cell carcinoma cell lines, and was implicated in promotion of  
442 metastasis by Tspan15 via the NF- $\kappa$ B pathway (Zhang *et al.* 2018). The Human Protein Atlas  
443 ([www.proteinatlas.org](http://www.proteinatlas.org)) indicates that BTRC mRNA has a broad expression profile in cell lines,  
444 including HEK-293T (Thul *et al.* 2017), suggesting that we should have identified BTRC if it is  
445 a *bone fide* Tspan15-interacting protein. The findings of our study lead us to speculate that  
446 Tspan15 may be promoting cancer via ADAM10, most likely due to cleaving of specific  
447 substrates that enhance the cancer phenotype. Interestingly, gene expression data suggests that  
448 Tspan15 is strongly upregulated in cholangiocarcinoma and pancreatic adenocarcinoma (Tang *et al.*  
449 *et al.* 2019), and is a marker of poor prognosis in pancreatic, renal and liver cancer (Uhlen *et al.*  
450 2017). Moreover, Tspan15 has been recently implicated in oral squamous cell carcinoma  
451 (Hiroshima *et al.* 2019) and hepatocellular carcinoma (Sidahmed-Adrar *et al.* 2019).

452 The generation of mAbs to certain tetraspanins is a recognised difficulty in the tetraspanin field;  
453 there are no mAbs to many of the 33 human tetraspanins. To initiate this study, we generated the  
454 first Tspan15 mAbs using a novel strategy. Mice were immunised with ADAM10-knockout  
455 MEFs stably over-expressing human Tspan15, with the aim of focussing the mAb response on  
456 Tspan15 and preventing the larger ADAM10 from masking epitopes or preventing mAb binding  
457 by steric hindrance. Screening of hybridomas yielded four mouse anti-human Tspan15 mAbs,  
458 each recognising a similar epitope on the large extracellular loop of Tspan15. However, the  
459 importance of using ADAM10-knockout cells as the immunogen remains unclear. The  
460 immunisation and hybridoma generation was outsourced to Abpro, whose proprietary mouse  
461 may have contributed to the success of our approach. Furthermore, Tspan15 may be a relatively  
462 easy target, since eight of the 121 amino acids in the large extracellular loop are different  
463 between human and mouse, yielding 93% identity and the likelihood of distinct epitopes for  
464 mAb recognition. Most other TspanC8s are more conserved between human and mouse, with  
465 identities of 100, 77, 98, 96 and 97% for Tspan5, 10, 14, 17 and 33, respectively. A recent study  
466 overcame the problem of the identical human and mouse Tspan5 protein sequences by  
467 generating Tspan5 mAbs from Tspan5-knockout mice immunised with GFP-Tspan5-transfected  
468 cells and immunoprecipitates (Saint-Pol *et al.* 2017). Nevertheless, we hypothesise that our new  
469 method of using tetraspanin-transfected cells, with the tetraspanin partner(s) deleted, may be an  
470 effective strategy for future tetraspanin mAb generation.

471 To conclude, our findings strongly suggest that Tspan15 exists as an ADAM10/Tspan15 scissor  
472 complex, which may be a general theme for the other five TspanC8s. We therefore propose that  
473 ADAM10 be studied in the context of its associated TspanC8. This has implications for future  
474 work that should aim to determine how ADAM10/TspanC8 complexes are triggered to cleave  
475 specific substrates, and whether ADAM10/TspanC8 complexes can be therapeutically targeted to  
476 treat human disease.

477

## 478 MATERIALS AND METHODS

### 479 Antibodies

480 Primary antibodies were rabbit anti-FLAG (Sigma-Aldrich, Poole, UK), mouse or rabbit anti- $\alpha$ -  
481 tubulin (Cell Signaling Technology, London, UK), mouse anti-human ADAM10 11G2 (Arduise  
482 *et al.* 2008), mouse anti-Tspan5 TS52 (Saint-Pol *et al.* 2017) and negative control mouse IgG1  
483 MOPC-21 (MP Biomedicals, Santa Ana, CA).

### 484 Expression constructs

485 pLVX-EF1 $\alpha$ -IRES-Puro FLAG-tagged human Tspan15 was generated by subcloning the FLAG-  
486 Tspan15 sequence into the pLVX-EF1 $\alpha$ -IRES-Puro lentiviral plasmid (Clontech, Mountain  
487 View, CA). N-terminal FLAG-tagged human and mouse TspanC8s in the pEF6-*myc*-His  
488 plasmid (Invitrogen, Carlsbad, CA) were as described (Haining *et al.* 2012). A series of  
489 human/mouse Tspan15 chimeric constructs were generated using a two-step PCR method to  
490 incorporate mouse residues into the human Tspan15 large extracellular loop and *vice versa*.  
491 GFP-tagged human Tspan5/Tspan15 chimeras in the pEGFP-N1 plasmid were as described  
492 (Saint-Pol *et al.* 2017). Human Tspan15 tagged at the C-terminus with the N-terminal half of  
493 superfolder GFP was generated by subcloning human Tspan15 into a pcDNA3.1/zeo split  
494 superfolder GFP vector (Kilpatrick *et al.* 2012). Mouse ADAM10 tagged at the C-terminus with  
495 the C-terminal half of superfolder GFP was generated using a two-step PCR approach in which  
496 the GFP tag was subcloned into pcDNA3.1 mouse ADAM10 (Maretzky *et al.* 2005). pRK5M  
497 human ADAM10 was a gift from Rik Derynck (Addgene plasmid # 31717) (Liu *et al.* 2009).  
498 The pRK5M ADAM10-Tspan15 fusion construct was generated by subcloning human Tspan15  
499 into pRK5M human ADAM10, at the C-terminus of ADAM10 to replace the myc tag. The  
500 alkaline phosphatase-tagged human betacellulin construct was kindly provided by Shigeki  
501 Higashiyama and Carl Blobel (Sahin *et al.* 2004).

### 502 Cell culture and transfections

503 ADAM10-knockout mouse embryonic fibroblasts (MEFs) (Reiss *et al.* 2005), human embryonic  
504 kidney (HEK)-293T (HEK-293 cells expressing the large T-antigen of simian virus 40) and the  
505 human lung epithelial cell line A549 were cultured in DMEM (Sigma-Aldrich), and the human T  
506 cell line Jurkat was cultured in RPMI 1640 (Sigma-Aldrich), each supplemented with 10% fetal  
507 bovine serum (Thermo Fisher Scientific, Loughborough, UK), 4 mM L-glutamine, 100 units/ml  
508 penicillin and 100  $\mu$ g/ml streptomycin (Sigma-Aldrich). Human umbilical vein endothelial cells  
509 (HUVECs) were isolated from umbilical cords obtained with consent from the Human  
510 Biomaterials Resource Centre at the University of Birmingham, UK, and cultured in M199  
511 supplemented with 10% fetal bovine serum, 4 mM glutamine, 90  $\mu$ g/ml heparin (Sigma-Aldrich)  
512 and bovine brain extract (Wilson *et al.* 2014), and used between passages 3 and 6. HEK-293T  
513 cells were transfected using polyethyleneimine as described (Ehrhardt *et al.* 2006). A549 cells  
514 were transfected with Lipofectamine 2000 (Thermo Fisher Scientific). Jurkat cells were

515 transfected by electroporation as previously described (Tomlinson *et al.* 2007). For siRNA  
516 knockdowns, HUVECs were transfected with 10 nM Silencer Select siRNA duplexes (Thermo  
517 Fisher Scientific) using Lipofectamine RNAiMAX (Thermo Fisher Scientific).

### 518 **Generation of CRISPR/Cas9-knockout cell lines**

519 Two guide RNA sequences were selected for each of human ADAM10 and Tspan15 using the  
520 Wellcome Trust Sanger Institute's CRISPR Finder tool (Hodgkins *et al.* 2015). The following  
521 primer pairs were used to encode these sequences: ADAM10 guide 1 (5'-  
522 CACCGCGTCTAGATTTCCATGCCCA-3' and 5'-AAACTGGGCATGGAAATCTAGACGC-  
523 3'); ADAM10 guide 2 (5'-CACCGATACCTCTCATATTTACAC-3' and 5'-  
524 AAACGTGTAAATATGAGAGGTATC-3'); Tspan15 guide 1 (5'-  
525 CACCGGCGCGCGCTTCTCCTACCTC-3' and 5'-AAACGAGGTAGGAGAAGCGCGCGCC-  
526 3'); Tspan15 guide 2 (5'-CACCGAGCGCCAGGATGCCGCGCG-3' and 5'-  
527 AAACCGCGCGGCATCCTGGGCGCTC-3'). Each primer pair was annealed and cloned into  
528 the pSpCas9 (BB)-2A-Puro (PX459) plasmid (a gift from Feng Zhang, Addgene plasmid  
529 #62988) (Ran *et al.* 2013). Cells were transfected with either of the guide constructs, clonal  
530 transfectants selected using 1, 2.5 and 0.5 µg/ml puromycin (Thermo Fisher Scientific) for A549,  
531 HEK-293T and Jurkat cells, respectively, and knockouts confirmed by flow cytometry.

### 532 **Human platelet preparation**

533 Washed human platelets were isolated from whole blood by centrifugation as described  
534 previously (McCarty *et al.* 2006). Blood samples were taken with consent from healthy donors.

### 535 **Generation of new Tspan15 mAbs**

536 To create the immunogen for mouse anti-human Tspan15 mAb generation, ADAM10-knockout  
537 MEFs were transduced with lentivirus packaged with FLAG-tagged human Tspan15, produced  
538 in HEK-293T cells using a previously described protocol (Reyat *et al.* 2017). Clonal cells stably  
539 overexpressing Tspan15 were selected with 1 µg/ml puromycin and validated by anti-FLAG  
540 western blotting. Immunisation of mice and generation of hybridomas were outsourced to Abpro  
541 Therapeutics (Boston, MA).

### 542 **Antibody conjugation**

543 Purified Tspan15 mAbs were concentrated to 1 mg/ml using Amicon Ultra Centrifugal Filters  
544 (Merck, Watford, UK) and conjugated to Alexa Fluor® 647 fluorophore with a succinimidyl  
545 ester reactive dye (Thermo Fisher Scientific) at an antibody-to-dye mass ratio of 10:1 for one  
546 hour at room temperature. Excess unbound dye was removed using Zeba Spin Desalting  
547 Columns (Thermo Fisher Scientific). The concentration and degree of labelling of the  
548 conjugated mAbs were measured spectrophotometrically.

### 549 **Flow cytometry**

550 2.5–5 x 10<sup>5</sup> cells were stained with primary antibodies at 10 µg/ml, followed by fluorescein  
551 isothiocyanate (FITC)-conjugated sheep anti-mouse (Sigma-Aldrich) or allophycocyanin (APC)-  
552 conjugated goat anti-mouse (Thermo Fisher Scientific) secondary antibodies. Samples were  
553 analysed on a FACSCalibur flow cytometer (BD Biosciences, Oxford, UK). Surface staining  
554 was quantitated by its geometric mean fluorescence intensity and presented as a ratio to the  
555 isotype control.

#### 556 **Antibody binding competition assay**

557 A549 cells were incubated with 10 µg/ml MOPC-21 or Tspan15 mAbs 1C12, 4A4, 5D4 or 5F4  
558 for 30 minutes on ice. The cells were then stained with 10 µg/ml of each of the Alexa Fluor®  
559 647-conjugated Tspan15 mAbs for 30 minutes on ice. Relative antibody binding was analysed  
560 by flow cytometry.

#### 561 **Immunoprecipitation and western blotting**

562 Immunoprecipitation and western blotting were performed as previously described (Noy *et al.*  
563 2016). Western blotting used IRDye 680RD or 800CW-conjugated secondary antibodies (LI-  
564 COR Biosciences, Cambridge, UK) and an Odyssey Quantitative Infrared Imaging System (LI-  
565 COR Biosciences).

#### 566 **Sample preparation for mass spectrometry**

567 2 x 10<sup>8</sup> wild-type or Tspan15-knockout HEK-293T cells were lysed in 1% digitonin lysis buffer  
568 containing protease inhibitor cocktail (Sigma-Aldrich). Lysates were pre-cleared with protein G  
569 sepharose prior to immunoprecipitation with Tspan15 mAb 1C12 chemically cross-linked to  
570 protein G sepharose with dimethyl pimelimidate (Thermo Fisher Scientific). Five independent  
571 immunoprecipitations were carried out for each cell type. Immunoprecipitation samples in non-  
572 reducing Laemmli buffer were subjected to a modified single-pot solid-phase-enhanced sample  
573 preparation (SP3) protocol (Hughes *et al.* 2019). Briefly, 10 µl of a 4 µg/µl bead slurry of Sera-  
574 Mag SpeedBeads A and B (GE Healthcare, Chicago, IL) were added to the samples. Protein  
575 binding to the magnetic beads was achieved by adding acetonitrile to a final volume of 70% (v/v)  
576 and mixing at 1200 rpm at 24 °C for 30 minutes in a Thermomixer (Eppendorf, Hamburg,  
577 Germany). Magnetic beads were retained in a DynaMag-2 magnetic rack (Thermo Fisher  
578 Scientific) and the supernatant was discarded. Disulfide bridges were reduced by adding 20 µl of  
579 30 mM dithiothreitol (Biozol, Eching, Germany) and incubating at 1200 rpm at 37 °C for 30  
580 minutes. Cysteines were alkylated by adding 25 µl of 80 mM iodoacetamide (Sigma-Aldrich)  
581 and incubating at 1200 rpm at 24 °C for 30 minutes in the dark in a Thermomixer. The reaction  
582 was quenched by adding 3 µl of 200 mM dithiothreitol. Protein binding to the beads was  
583 repeated in 70% (v/v) acetonitrile for 30 minutes. After removing the solvent, beads were  
584 washed twice in 200 µl 70% (v/v) ethanol and twice in 180 µl of 100% (v/v) acetonitrile. Next,  
585 250 ng of LysC and 250 ng of trypsin (Promega, Mannheim, Germany) were added in 20 µl of  
586 50 mM ammonium bicarbonate (Sigma Aldrich). The protein digestion was performed for 16



587 hours at room temperature. Samples were acidified with formic acid to a final concentration of  
588 1% (v/v) and placed in a magnetic rack. The supernatants were transferred into fresh 0.5 ml  
589 protein LoBind tubes (Eppendorf). A volume of 20  $\mu$ l of 2% (v/v) dimethyl sulfoxide was added  
590 to the beads and subjected to sonication for 30 seconds in a water bath. Tubes were placed in the  
591 magnetic rack and the supernatants were transferred. The samples were dried in a vacuum  
592 centrifuge and dissolved in 20  $\mu$ l 0.1% formic acid.

### 593 **Liquid chromatography coupled with tandem mass spectrometry (LC-MS/MS) analysis**

594 Samples were analyzed by LC-MS/MS for relative label free protein quantification. A volume  
595 of 10  $\mu$ l per sample was separated on a nanoLC system (EASY-nLC 1200, Thermo Fisher  
596 Scientific) using an in-house packed C18 column (30 cm x 75  $\mu$ m ID, ReproSil-Pur 120 C18-  
597 AQ, 1.9  $\mu$ m; Dr. Maisch GmbH, Ammerbuch, Germany) with a binary gradient of water (A) and  
598 acetonitrile (B) containing 0.1% formic acid at 50 °C column temperature and a flow rate of 250  
599 nl/minute (gradient: 0 minutes 2.4% B; 2 minutes, 4.8% B; 92 minutes, 24% B; 112 minutes,  
600 35.2% B; 121 minutes, 60% B).

601 The nanoLC was coupled online via a nanospray flex ion source (Proxeon, Thermo Fisher  
602 Scientific) equipped with a PRSO-V2 column oven (Sonation, Biberach an der Riss, Germany)  
603 to a Q-Exactive HF mass spectrometer (Thermo Fisher Scientific). Full MS spectra were  
604 acquired at a resolution of 120,000. The top 15 peptide ions were chosen for Higher-energy C-  
605 trap Dissociation (HCD) (normalized collision energy of 26%, automatic gain control 1E+5 ions,  
606 intensity threshold 5E+3 ions, maximum ion trapping time 100 ms). Fragment ion spectra were  
607 acquired at a resolution of 15,000. A dynamic exclusion of 120 s was used for peptide  
608 fragmentation.

### 609 **Data analysis and label free quantification**

610 The raw data was analyzed by Maxquant software ([maxquant.org](http://maxquant.org), Max-Planck Institute Munich)  
611 version 1.6.6.0 (Cox *et al.* 2014). The MS data was searched against a fasta database of *Homo*  
612 *sapiens* from UniProt (download: June 12<sup>th</sup> 2019, 20962 entries). Trypsin was defined as the  
613 protease. Two missed cleavages were allowed for the database search. The option first search  
614 was used to recalibrate the peptide masses within a window of 20 ppm. For the main search,  
615 peptide and peptide fragment mass tolerances were set to 4.5 and 20 ppm, respectively.  
616 Carbamidomethylation of cysteine was defined as static modification. Acetylation of the protein  
617 N-terminus and oxidation of methionine were set as variable modifications. The false discovery  
618 rate for both peptides and proteins was adjusted to less than 1%. Label free quantification of  
619 proteins required at least two ratio counts of unique peptides. Only unique peptides were used  
620 for quantification. The option “match between runs” was enabled with a matching time of 1  
621 minute.

622 The protein label free quantification intensities were log<sub>2</sub> transformed and a two-sided Student's  
623 *t*-test was applied to evaluate the significance of proteins with changed abundance between the

624 TSPAN15 immunoprecipitation from wild-type samples and the control immunoprecipitation  
625 from Tspan15-knockout samples. Additionally, a permutation-based false discovery rate  
626 estimation was used (Tusher *et al.* 2001).

### 627 **Quantitative reverse-transcription PCR (qRT-PCR)**

628 RNA was extracted using the RNeasy Mini kit (Qiagen, Manchester, UK) from cells  
629 homogenised with QIAshredder columns (Qiagen). Complementary DNA was generated using  
630 the High Capacity cDNA Reverse Transcription kit (Thermo Fisher Scientific) and subjected to  
631 TaqMan qPCR assays (Thermo Fisher Scientific) for Tspan15 (Hs00202548\_m1) and GAPDH  
632 (Hs02758991\_g1) and analysed as described (Reyat *et al.* 2017). All qPCR data were  
633 normalised to GAPDH as the internal loading control.

### 634 **Confocal microscopy**

635 All reagents are from Sigma-Aldrich unless otherwise stated. Cells were fixed with 10%  
636 formalin for 15 minutes and washed three times with PBS (0.01 M phosphate, 0.0027 M KCl,  
637 0.137 M NaCl, pH 7.4) before blocking in PBS containing 1% BSA, 2% goat serum (or mouse  
638 serum for direct staining with conjugated mouse primary antibodies) and 0.1% saponin for 20  
639 minutes to permeabilise the cells. The same buffer was used for antibody dilutions. Cells were  
640 incubated with antibodies for one hour and washed three to four times with PBS after  
641 incubations. For direct labelling of Tspan15, cells were stained with 5 µg/ml Alexa Fluor® 647-  
642 conjugated Tspan15 mAb (5D4). For simultaneous staining of ADAM10 and Tspan15, cells  
643 were first stained with 0.5 µg/ml ADAM10 mAb (11G2) and then secondarily labelled with  
644 Alexa Fluor®-conjugated goat anti-mouse antibody, followed by direct staining of Tspan15 as  
645 described above. Confocal Z-stacks of stained cells were taken at 1 µm intervals on a Leica TCS  
646 SP2 confocal microscope (Leica Biosystems, Wetzlar, Germany) with 488 nm Argon and 633  
647 nm Helium/Neon laser lines with a 63x 1.4 NA oil objective. For imaging of non-permeabilised  
648 cells, the Nikon A1R confocal system (Nikon, Tokyo, Japan), equipped with a 100x 1.4 NA oil  
649 objective and similar lasers to those above, was used for acquisition of z-stacks.

### 650 **Fluorescence correlation spectroscopy (FCS)**

651  $1.5 \times 10^4$  HEK-293T cells were seeded onto Nunc Lab-Tek 8-well glass-bottomed chamber  
652 slides (0.13-0.17 mm thick, #1.0 borosilicate glass) (Thermo Fisher Scientific) pre-coated with  
653 10 µg/ml poly-D-lysine (Sigma-Aldrich). 24 hours later, cells were transfected with ADAM10  
654 and Tspan15 split superfolder GFP (sfGFP) expression constructs. After a further 24 hours,  
655 media was replaced with 200 µl/well HEPES-buffered saline solution (2 mM sodium pyruvate,  
656 145 mM NaCl, 10 mM D-glucose, 5 mM KCl, 1 mM MgSO<sub>4</sub>·7H<sub>2</sub>O, 10 mM HEPES, 1.3 mM  
657 CaCl<sub>2</sub>, 1.5 mM NaHCO<sub>3</sub>, pH 7.45) and equilibrated for 10 minutes at 22 °C prior to FCS  
658 recording on a Zeiss LSM 510NLO Confocor 3 microscope (Carl Zeiss, Jena, Germany).  
659 Fluorescence fluctuations were collected using a c-Apochromat 40x 1.2 NA water immersion  
660 objective using 488 nm excitation with emission collected through a 505-600 long pass filter.



661 FCS acquisition, autocorrelation and photon counting histogram (PCH) analyses were performed  
662 as described previously (Ayling *et al.* 2012). In brief, the confocal volume was calibrated with  
663 20 nM rhodamine 6G dye on each experimental day. For cell measurements, the detection  
664 volume was positioned in x-y over the cell of interest using a live confocal image, and then on  
665 the apical cell membrane following a z-intensity scan using  $\sim 0.04 \text{ kW/cm}^2$  laser power.  
666 Fluctuation traces were recorded at 22 °C on the apical membrane for each cell for 30 seconds  
667 using  $\sim 0.17 \text{ kW/cm}^2$  laser power. Autocorrelation and PCH analyses were performed in Zen  
668 2012 (Carl Zeiss), with the first 5 seconds of fluctuations routinely removed to adjust for  
669 photobleaching. Autocorrelation curves were fitted to a two-component, 2D diffusion model  
670 with a pre-exponential term to account for sfGFP blinking, with an offset added where necessary  
671 to obtain average dwell times and particle numbers. As previously demonstrated, component 1  
672 (300-600  $\mu\text{s}$ ) represents a dark state of the sfGFP fluorophore, whilst component 2 represents the  
673 dwell time of the sfGFP-labelled complex (Ayling *et al.* 2012; Kilpatrick *et al.* 2012). Diffusion  
674 coefficients of the sfGFP-labelled complex were calculated for each trace using the equation  $D =$   
675  $\omega_0^2/4 \cdot \tau_D$ , where  $\omega_0$  is the radius of the detection volume (obtained from calibration) and  $\tau_D$  the  
676 average dwell time of component 2. Particle numbers of component 2 were expressed as  
677 particles per  $\mu\text{m}^2$ , calculated from  $N = N(\tau_{D2}) / \pi \cdot \omega_0^2$ , where  $N(\tau_{D2})$  is the fractional contribution  
678 of component 2 to the total particle number determined from the autocorrelation curve.  
679 Molecular brightness of complexes was determined using PCH analyses carried out on the same  
680 fluctuation traces as used for autocorrelation analyses using Zen 2012. Traces were binned at  
681 100  $\mu\text{s}$  and fitted to either a 1- or 2-component PCH model with the first order correction fixed at  
682 0.3, as determined from the calibration read. Data are shown as values obtained from individual  
683 cell membranes, obtained over 'n' independent transfections.

#### 684 **Betacellulin shedding assay**

685 ADAM10/Tspan15 double knockout HEK-293T cells were transfected in 24-well plates with  
686 200 ng of alkaline phosphatase-conjugated betacellulin expression construct and 50 ng total of  
687 ADAM10, Tspan15, ADAM10 plus Tspan15, or the ADAM10/Tspan15 fusion construct. 24  
688 hours post transfection, cells were washed and stimulated with 2 mM N-ethylmaleimide (NEM)  
689 (Sigma-Aldrich), or ethanol vehicle control, for 2.5 hours in Opti-MEM reduced serum media  
690 (Thermo Fisher Scientific). Alkaline phosphatase activity in supernatant and cell lysate samples  
691 were measured using p-nitrophenyl phosphate (pNPP) substrate (Sigma-Aldrich) and a VICTOR  
692 X3 Multilabel Plate Reader (Perkin Elmer, Seer Green, UK). The supernatant activity as a  
693 percentage of the total was calculated to determine the percentage shedding.

#### 694 **Statistical analyses**

695 Relative data were normalised by either log- or arcsine-transformation before being statistical  
696 analysed using ANOVA with post-hoc multiple comparison tests, as indicated in the figure  
697 legends.

698 **ACKNOWLEDGMENTS**

699 We are grateful for members of the *Cells & Molecules* research theme in the School of  
700 Biosciences for their helpful comments on this project. We also thank the Birmingham  
701 Advanced Light Microscope Facility and COMPARE for advice on fluorescence microscopy.  
702 This work was funded by a British Heart Foundation PhD Studentship and COMPARE grant  
703 which supported C.Z.K. (FS/18/9/33388), a Biotechnology and Biological Sciences Research  
704 Council Project Grant which supported N.H. (BB/P00783X/1), a British Heart Foundation  
705 Project Grant (PG/13/92/30587) which supported P.J.N., and Biotechnology and Biological  
706 Sciences Research Council PhD Studentships which supported J.S. and A.L.M. This work was  
707 also supported by the Deutsche Forschungsgemeinschaft (German Research Foundation) within  
708 the framework of the Munich Cluster for Systems Neurology (EXC 2145 SyNergy) and by the  
709 BMBF through CLINSPECT-M to S.F.L. Further support was provided by a Deutsche  
710 Forschungsgemeinschaft grant (DFG-SFB877-A3) to P.S.

711

712

713 **COMPETING INTERESTS**

714 The authors declare no competing interests.

715

716 **REFERENCES**

- 717 Arduise, C., T. Abache, L. Li, M. Billard, A. Chabanon, A. Ludwig, P. Mauduit, C. Boucheix, E.  
718 Rubinstein and F. Le Naour (2008). Tetraspanins regulate ADAM10-mediated cleavage of TNF-  
719 alpha and epidermal growth factor. *J Immunol* **181**: 7002-7013.
- 720 Ayling, L. J., S. J. Briddon, M. L. Halls, G. R. Hammond, L. Vaca, J. Pacheco, S. J. Hill and D.  
721 M. Cooper (2012). Adenylyl cyclase AC8 directly controls its micro-environment by recruiting  
722 the actin cytoskeleton in a cholesterol-rich milieu. *J Cell Sci* **125**: 869-886. 10.1242/jcs.091090.
- 723 Brummer, T., S. A. Muller, F. Pan-Montojo, F. Yoshida, A. Fellgiebel, T. Tomita, K. Endres and  
724 S. F. Lichtenthaler (2019). NrCAM is a marker for substrate-selective activation of ADAM10 in  
725 Alzheimer's disease. *EMBO Mol Med* **11**: e9695. 10.15252/emmm.201809695.
- 726 Brummer, T., M. Pignoni, A. Rossello, H. Wang, P. J. Noy, M. G. Tomlinson, C. P. Blobel and S.  
727 F. Lichtenthaler (2018). The metalloprotease ADAM10 (a disintegrin and metalloprotease 10)  
728 undergoes rapid, postlysis autocatalytic degradation. *FASEB J* **32**: 3560-3573.  
729 10.1096/fj.201700823RR.
- 730 Cox, J., M. Y. Hein, C. A. Luber, I. Paron, N. Nagaraj and M. Mann (2014). Accurate proteome-  
731 wide label-free quantification by delayed normalization and maximal peptide ratio extraction,  
732 termed MaxLFQ. *Mol Cell Proteomics* **13**: 2513-2526. 10.1074/mcp.M113.031591.
- 733 Dahmane, S., C. Doucet, A. Le Gall, C. Chamontin, P. Dosset, F. Murcy, L. Fernandez, D. Salas,  
734 E. Rubinstein, M. Mougel, M. Nollmann and P. E. Milhiet (2019). Nanoscale organization of  
735 tetraspanins during HIV-1 budding by correlative dSTORM/AFM. *Nanoscale* **11**: 6036-6044.  
736 10.1039/c8nr07269h.
- 737 Dornier, E., F. Coumailleau, J. F. Ottavi, J. Moretti, C. Boucheix, P. Mauduit, F. Schweisguth  
738 and E. Rubinstein (2012). TspanC8 tetraspanins regulate ADAM10/Kuzbanian trafficking and  
739 promote Notch activation in flies and mammals. *J Cell Biol* **199**: 481-496.  
740 10.1083/jcb.201201133.
- 741 Ehrhardt, C., M. Schmolke, A. Matzke, A. Knoblauch, C. Will, V. Wixler and S. Ludwig (2006).  
742 Polyethylenimine, a cost-effective transfection reagent. *Signal Transduction* **6**: 179-184.
- 743 Haining, E. J., J. Yang, R. L. Bailey, K. Khan, R. Collier, S. Tsai, S. P. Watson, J. Frampton, P.  
744 Garcia and M. G. Tomlinson (2012). The TspanC8 subgroup of tetraspanins interacts with A  
745 disintegrin and metalloprotease 10 (ADAM10) and regulates its maturation and cell surface  
746 expression. *J Biol Chem* **287**: 39753-39765. 10.1074/jbc.M112.416503.
- 747 Hiroshima, K., M. Shiiba, N. Oka, F. Hayashi, S. Ishida, R. Fukushima, K. Koike, M. Iyoda, D.  
748 Nakashima, H. Tanzawa and K. Uzawa (2019). Tspan15 plays a crucial role in metastasis in oral  
749 squamous cell carcinoma. *Exp Cell Res*: 111622. 10.1016/j.yexcr.2019.111622.
- 750 Hodgkins, A., A. Farne, S. Perera, T. Grego, D. J. Parry-Smith, W. C. Skarnes and V. Iyer  
751 (2015). WGE: a CRISPR database for genome engineering. *Bioinformatics* **31**: 3078-3080.  
752 10.1093/bioinformatics/btv308.

- 753 Hughes, C. S., S. Moggridge, T. Muller, P. H. Sorensen, G. B. Morin and J. Krijgsveld (2019).  
754 Single-pot, solid-phase-enhanced sample preparation for proteomics experiments. *Nat Protoc* **14**:  
755 68-85. 10.1038/s41596-018-0082-x.
- 756 Jouannet, S., J. Saint-Pol, L. Fernandez, V. Nguyen, S. Charrin, C. Boucheix, C. Brou, P. E.  
757 Milhiet and E. Rubinstein (2016). TspanC8 tetraspanins differentially regulate the cleavage of  
758 ADAM10 substrates, Notch activation and ADAM10 membrane compartmentalization. *Cell Mol*  
759 *Life Sci* **73**: 1895-1915. 10.1007/s00018-015-2111-z.
- 760 Kilpatrick, L. E., S. J. Briddon and N. D. Holliday (2012). Fluorescence correlation  
761 spectroscopy, combined with bimolecular fluorescence complementation, reveals the effects of  
762 beta-arrestin complexes and endocytic targeting on the membrane mobility of neuropeptide Y  
763 receptors. *Biochim Biophys Acta* **1823**: 1068-1081. 10.1016/j.bbamcr.2012.03.002.
- 764 Lichtenthaler, S. F., M. K. Lemberg and R. Fluhrer (2018). Proteolytic ectodomain shedding of  
765 membrane proteins in mammals—hardware, concepts, and recent developments. *EMBO J* **37**.  
766 10.15252/embj.201899456.
- 767 Liu, C., P. Xu, S. Lamouille, J. Xu and R. Derynck (2009). TACE-mediated ectodomain  
768 shedding of the type I TGF-beta receptor downregulates TGF-beta signaling. *Mol Cell* **35**: 26-36.  
769 10.1016/j.molcel.2009.06.018.
- 770 Maretzky, T., M. Schulte, A. Ludwig, S. Rose-John, C. Blobel, D. Hartmann, P. Altevogt, P.  
771 Saftig and K. Reiss (2005). L1 is sequentially processed by two differently activated  
772 metalloproteases and presenilin/gamma-secretase and regulates neural cell adhesion, cell  
773 migration, and neurite outgrowth. *Mol Cell Biol* **25**: 9040-9053. 10.1128/MCB.25.20.9040-  
774 9053.2005.
- 775 Marjon, K. D., C. M. Termini, K. L. Karlen, C. Saito-Reis, C. E. Soria, K. A. Lidke and J. M.  
776 Gillette (2016). Tetraspanin CD82 regulates bone marrow homing of acute myeloid leukemia by  
777 modulating the molecular organization of N-cadherin. *Oncogene* **35**: 4132-4140.  
778 10.1038/onc.2015.449.
- 779 Matthews, A. L., C. Z. Koo, J. Szyroka, N. Harrison, A. Kanhere and M. G. Tomlinson (2018).  
780 Regulation of Leukocytes by TspanC8 Tetraspanins and the "Molecular Scissor" ADAM10.  
781 *Front Immunol* **9**: 1451. 10.3389/fimmu.2018.01451.
- 782 Matthews, A. L., P. J. Noy, J. S. Reyat and M. G. Tomlinson (2017). Regulation of A disintegrin  
783 and metalloproteinase (ADAM) family sheddases ADAM10 and ADAM17: The emerging role  
784 of tetraspanins and rhomboids. *Platelets* **28**: 333-341. 10.1080/09537104.2016.1184751.
- 785 Matthews, A. L., J. Szyroka, R. Collier, P. J. Noy and M. G. Tomlinson (2017). Scissor sisters:  
786 regulation of ADAM10 by the TspanC8 tetraspanins. *Biochem Soc Trans* **45**: 719-730.  
787 10.1042/BST20160290.
- 788 McCarty, O. J., S. D. Calaminus, M. C. Berndt, L. M. Machesky and S. P. Watson (2006). von  
789 Willebrand factor mediates platelet spreading through glycoprotein Ib and alpha(IIb)beta3 in the  
790 presence of botrocetin and ristocetin, respectively. *J Thromb Haemost* **4**: 1367-1378.

- 791 Min, G., H. Wang, T. T. Sun and X. P. Kong (2006). Structural basis for tetraspanin functions as  
792 revealed by the cryo-EM structure of uroplakin complexes at 6-A resolution. *J Cell Biol* **173**:  
793 975-983.
- 794 Noy, P. J., J. Yang, J. S. Reyat, A. L. Matthews, A. E. Charlton, J. Furmston, D. A. Rogers, G. E.  
795 Rainger and M. G. Tomlinson (2016). TspanC8 Tetraspanins and A Disintegrin and  
796 Metalloprotease 10 (ADAM10) Interact via Their Extracellular Regions: EVIDENCE FOR  
797 DISTINCT BINDING MECHANISMS FOR DIFFERENT TspanC8 PROTEINS. *J Biol Chem*  
798 **291**: 3145-3157. 10.1074/jbc.M115.703058.
- 799 Prox, J., M. Willenbrock, S. Weber, T. Lehmann, D. Schmidt-Arras, R. Schwanbeck, P. Saftig  
800 and M. Schwake (2012). Tetraspanin15 regulates cellular trafficking and activity of the  
801 ectodomain sheddase ADAM10. *Cell Mol Life Sci* **69**: 2919-2932. 10.1007/s00018-012-0960-2.
- 802 Ran, F. A., P. D. Hsu, J. Wright, V. Agarwala, D. A. Scott and F. Zhang (2013). Genome  
803 engineering using the CRISPR-Cas9 system. *Nat Protoc* **8**: 2281-2308. 10.1038/nprot.2013.143.
- 804 Reiss, K., T. Maretzky, A. Ludwig, T. Tousseyn, B. de Strooper, D. Hartmann and P. Saftig  
805 (2005). ADAM10 cleavage of N-cadherin and regulation of cell-cell adhesion and beta-catenin  
806 nuclear signalling. *EMBO J* **24**: 742-752. 10.1038/sj.emboj.7600548.
- 807 Reyat, J. S., M. Chimen, P. J. Noy, J. Szyroka, G. E. Rainger and M. G. Tomlinson (2017).  
808 ADAM10-Interacting Tetraspanins Tspan5 and Tspan17 Regulate VE-Cadherin Expression and  
809 Promote T Lymphocyte Transmigration. *J Immunol* **199**: 666-676. 10.4049/jimmunol.1600713.
- 810 Reyat, J. S., M. G. Tomlinson and P. J. Noy (2017). Utilizing Lentiviral Gene Transfer in  
811 Primary Endothelial Cells to Assess Lymphocyte-Endothelial Interactions. *Methods Mol Biol*  
812 **1591**: 155-168. 10.1007/978-1-4939-6931-9\_11.
- 813 Rubinstein, E., S. Charrin and M. G. Tomlinson (2013). Organisation of the tetraspanin web.  
814 Tetraspanins. F. Berditchevski and E. Rubinstein. Dordrecht, Springer: 47-90.
- 815 Sahin, U., G. Weskamp, K. Kelly, H. M. Zhou, S. Higashiyama, J. Peschon, D. Hartmann, P.  
816 Saftig and C. P. Blobel (2004). Distinct roles for ADAM10 and ADAM17 in ectodomain  
817 shedding of six EGFR ligands. *Journal of Cell Biology* **164**: 769-779.
- 818 Saint-Pol, J., M. Billard, E. Dornier, E. Eschenbrenner, L. Danglot, C. Boucheix, S. Charrin and  
819 E. Rubinstein (2017). New insights into the tetraspanin Tspan5 using novel monoclonal  
820 antibodies. *J Biol Chem* **292**: 9551-9566. 10.1074/jbc.M116.765669.
- 821 Saint-Pol, J., E. Eschenbrenner, E. Dornier, C. Boucheix, S. Charrin and E. Rubinstein (2017).  
822 Regulation of the trafficking and the function of the metalloprotease ADAM10 by tetraspanins.  
823 *Biochem Soc Trans* **45**: 937-944. 10.1042/BST20160296.
- 824 Seipold, L., H. Altmepfen, T. Koudelka, A. Tholey, P. Kasparek, R. Sedlacek, M. Schweizer, J.  
825 Bar, M. Mikhaylova, M. Glatzel and P. Saftig (2018). In vivo regulation of the A disintegrin and  
826 metalloproteinase 10 (ADAM10) by the tetraspanin 15. *Cell Mol Life Sci* **75**: 3251-3267.  
827 10.1007/s00018-018-2791-2.
- 828 Shah, J., F. Rouaud, D. Guerrero, E. Vasileva, L. M. Popov, W. L. Kelley, E. Rubinstein, J. E.  
829 Carette, M. R. Amieva and S. Citi (2018). A Dock-and-Lock Mechanism Clusters ADAM10 at



- 830 Cell-Cell Junctions to Promote alpha-Toxin Cytotoxicity. *Cell Rep* **25**: 2132-2147 e2137.  
831 10.1016/j.celrep.2018.10.088.
- 832 Sidahmed-Adrar, N., J. F. Ottavi, N. Benzoubir, T. Ait Saadi, M. Bou Saleh, P. Mauduit, C.  
833 Guettier, C. Desterke and F. Le Naour (2019). Tspan15 Is a New Stemness-Related Marker in  
834 Hepatocellular Carcinoma. *Proteomics*: e1900025. 10.1002/pmic.201900025.
- 835 Sievers, F., A. Wilm, D. Dineen, T. J. Gibson, K. Karplus, W. Li, R. Lopez, H. McWilliam, M.  
836 Remmert, J. Soding, J. D. Thompson and D. G. Higgins (2011). Fast, scalable generation of  
837 high-quality protein multiple sequence alignments using Clustal Omega. *Mol Syst Biol* **7**: 539.  
838 10.1038/msb.2011.75.
- 839 Tang, Z., B. Kang, C. Li, T. Chen and Z. Zhang (2019). GEPIA2: an enhanced web server for  
840 large-scale expression profiling and interactive analysis. *Nucleic Acids Res* **47**: W556-W560.  
841 10.1093/nar/gkz430.
- 842 Termini, C. M. and J. M. Gillette (2017). Tetraspanins Function as Regulators of Cellular  
843 Signaling. *Front Cell Dev Biol* **5**: 34. 10.3389/fcell.2017.00034.
- 844 Thul, P. J., L. Akesson, M. Wiking, D. Mahdessian, A. Geladaki, H. Ait Blal, T. Alm, A.  
845 Asplund, L. Bjork, L. M. Breckels, A. Backstrom, F. Danielsson, L. Fagerberg, J. Fall, L. Gatto,  
846 C. Gnann, S. Hober, M. Hjelmare, F. Johansson, S. Lee, C. Lindskog, J. Mulder, C. M. Mulvey,  
847 P. Nilsson, P. Oksvold, J. Rockberg, R. Schutten, J. M. Schwenk, A. Sivertsson, E. Sjostedt, M.  
848 Skogs, C. Stadler, D. P. Sullivan, H. Tegel, C. Winsnes, C. Zhang, M. Zwahlen, A. Mardinoglu,  
849 F. Ponten, K. von Feilitzen, K. S. Lilley, M. Uhlen and E. Lundberg (2017). A subcellular map  
850 of the human proteome. *Science* **356**. 10.1126/science.aal3321.
- 851 Tomlinson, M. G., S. D. Calaminus, O. Berlanga, J. M. Auger, T. Bori-Sanz, L. Meyaard and S.  
852 P. Watson (2007). Collagen promotes sustained glycoprotein VI signaling in platelets and cell  
853 lines. *J Thromb Haemost* **5**: 2274-2283.
- 854 Tomlinson, M. G., T. Hanke, D. A. Hughes, A. N. Barclay, E. Scholl, T. Hünig and M. D.  
855 Wright (1995). Characterization of mouse CD53: epitope mapping, cellular distribution and  
856 induction by T cell receptor engagement during repertoire selection. *Eur J Immunol* **25**: 2201-  
857 2206.
- 858 Tomlinson, M. G., A. F. Williams and M. D. Wright (1993). Epitope mapping of anti-rat CD53  
859 monoclonal antibodies. Implications for the membrane orientation of the transmembrane 4  
860 superfamily. *Eur J Immunol* **23**: 136-140.
- 861 Tusher, V. G., R. Tibshirani and G. Chu (2001). Significance analysis of microarrays applied to  
862 the ionizing radiation response. *Proc Natl Acad Sci U S A* **98**: 5116-5121.  
863 10.1073/pnas.091062498.
- 864 Uhlen, M., C. Zhang, S. Lee, E. Sjostedt, L. Fagerberg, G. Bidkhori, R. Benfeitas, M. Arif, Z.  
865 Liu, F. Edfors, K. Sanli, K. von Feilitzen, P. Oksvold, E. Lundberg, S. Hober, P. Nilsson, J.  
866 Mattsson, J. M. Schwenk, H. Brunnstrom, B. Glimelius, T. Sjoblom, P. H. Edqvist, D.  
867 Djureinovic, P. Micke, C. Lindskog, A. Mardinoglu and F. Ponten (2017). A pathology atlas of  
868 the human cancer transcriptome. *Science* **357**. 10.1126/science.aan2507.

- 869 van Deventer, S. J., V. E. Dunlock and A. B. van Spriel (2017). Molecular interactions shaping  
870 the tetraspanin web. *Biochem Soc Trans* **45**: 741-750. 10.1042/BST20160284.
- 871 Virreira Winter, S., A. Zychlinsky and B. W. Bardoel (2016). Genome-wide CRISPR screen  
872 reveals novel host factors required for Staphylococcus aureus alpha-hemolysin-mediated  
873 toxicity. *Sci Rep* **6**: 24242. 10.1038/srep24242.
- 874 Wetzel, S., L. Seipold and P. Saftig (2017). The metalloproteinase ADAM10: A useful  
875 therapeutic target? *Biochim Biophys Acta*. 10.1016/j.bbamcr.2017.06.005.
- 876 Wilson, E., K. Leszczynska, N. S. Poulter, F. Edelmann, V. A. Salisbury, P. J. Noy, A. Bacon, J.  
877 Z. Rappoport, J. K. Heath, R. Bicknell and V. L. Heath (2014). RhoJ interacts with the GIT-PIX  
878 complex and regulates focal adhesion disassembly. *J Cell Sci* **127**: 3039-3051.  
879 10.1242/jcs.140434.
- 880 Zhang, B., Z. Zhang, L. Li, Y. R. Qin, H. Liu, C. Jiang, T. T. Zeng, M. Q. Li, D. Xie, Y. Li, X.  
881 Y. Guan and Y. H. Zhu (2018). TSPAN15 interacts with BTRC to promote oesophageal  
882 squamous cell carcinoma metastasis via activating NF-kappaB signaling. *Nat Commun* **9**: 1423.  
883 10.1038/s41467-018-03716-9.
- 884 Zhou, J., T. Fujiwara, S. Ye, X. Li and H. Zhao (2014). Downregulation of Notch modulators,  
885 tetraspanin 5 and 10, inhibits osteoclastogenesis in vitro. *Calcif Tissue Int* **95**: 209-217.  
886 10.1007/s00223-014-9883-2.
- 887 Zimmerman, B., B. Kelly, B. J. McMillan, T. C. Seegar, R. O. Dror, A. C. Kruse and S. C.  
888 Blacklow (2016). Crystal Structure of a Full-Length Human Tetraspanin Reveals a Cholesterol-  
889 Binding Pocket. *Cell* **167**: 1041-1051. 10.1016/j.cell.2016.09.056.
- 890 Zuidscherwoude, M., F. Gottfert, V. M. Dunlock, C. G. Figdor, G. van den Bogaart and A. B.  
891 van Spriel (2015). The tetraspanin web revisited by super-resolution microscopy. *Sci Rep* **5**:  
892 12201. 10.1038/srep12201.
- 893
